# Supplementary material for: Is the association between health-related quality of life and fatigue mediated by depression in patients with multiple sclerosis? A Spanish cross-sectional study
Source: PubMed Central journal article supplement — BMJ Open. 2018 Jan 23;8(1):e016297. doi: 10.1136/bmjopen-2017-016297 (PMC5786117; doi:10.1136/bmjopen-2017-016297), 2018-01-23
Supplement: bmjopen-2017-016297.draft_revisions.pdf [file bmjopen-2017-016297.draft_revisions.pdf]

# BMJ Open

BMJ Open is committed to open peer review. As part of this commitment we make the peer review history of every article we publish publicly available.

When an article is published we post the peer reviewers' comments and the authors' responses online. We also post the versions of the paper that were used during peer review. These are the versions that the peer review comments apply to.

The versions of the paper that follow are the versions that were submitted during the peer review process. They are not the versions of record or the final published versions. They should not be cited or distributed as the published version of this manuscript.

BMJ Open is an open access journal and the full, final, typeset and author-corrected version of record of the manuscript is available on our site with no access controls, subscription charges or pay-per-view fees (<http://bmjopen.bmj.com>).

If you have any questions on BMJ Open's open peer review process please email [editorial.bmjopen@bmj.com](mailto:editorial.bmjopen@bmj.com)

# BMJ Open

## Direct and Indirect Effects of Depression and Health-Related Quality of Life on Fatigue in Patients with Multiple Sclerosis

|                                 |                                                                                                                                                                                                                                                                                                                                                                                                                                                                                                                                                                              |
|---------------------------------|------------------------------------------------------------------------------------------------------------------------------------------------------------------------------------------------------------------------------------------------------------------------------------------------------------------------------------------------------------------------------------------------------------------------------------------------------------------------------------------------------------------------------------------------------------------------------|
| Journal:                        | <i>BMJ Open</i>                                                                                                                                                                                                                                                                                                                                                                                                                                                                                                                                                              |
| Manuscript ID                   | bmjopen-2017-016297                                                                                                                                                                                                                                                                                                                                                                                                                                                                                                                                                          |
| Article Type:                   | Research                                                                                                                                                                                                                                                                                                                                                                                                                                                                                                                                                                     |
| Date Submitted by the Author:   | 05-Feb-2017                                                                                                                                                                                                                                                                                                                                                                                                                                                                                                                                                                  |
| Complete List of Authors:       | Fernández-Muñoz, Juan J; Universidad Rey Juan Carlos, Psychology<br>Cigarán-Méndez, Margarita; Universidad Rey Juan Carlos, Psychology<br>Navarro-Pardo, Esperanza; Universitat de Valencia, Psicología Evolutiva y de la Educación<br>Perez-de-Heredia, Marta; Universidad Rey Juan Carlos, Physiotherapy, Occupational Therapy, Rehabilitation and Physical Medicine.<br>Paras-Bravo, Paula; Universidad de Cantabria, Nursing<br>Fernández-de-las-Peñas, César; Universidad Rey Juan Carlos, Physical Therapy, Occupational Therapy, Rehabilitacion and Physical Medicine |
| <b>Primary Subject Heading</b>: | Neurology                                                                                                                                                                                                                                                                                                                                                                                                                                                                                                                                                                    |
| Secondary Subject Heading:      | Neurology                                                                                                                                                                                                                                                                                                                                                                                                                                                                                                                                                                    |
| Keywords:                       | Multiple sclerosis < NEUROLOGY, fatigue, Depression & mood disorders < PSYCHIATRY, quality of life                                                                                                                                                                                                                                                                                                                                                                                                                                                                           |
|                                 |                                                                                                                                                                                                                                                                                                                                                                                                                                                                                                                                                                              |

SCHOLARONE™  
Manuscripts

only

## Direct and Indirect Effects of Depression and Health-Related Quality of Life on Fatigue in Patients with Multiple Sclerosis

### Authors

Juan J. Fernández-Muñoz<sup>1</sup> PhD; Margarita Cigarán-Méndez<sup>1</sup> PhD; Esperanza Navarro-Pardo<sup>2</sup> PhD; Marta Pérez-de-Heredia-Torres<sup>3</sup> PhD; Paula Parás-Bravo<sup>4</sup> PT; César Fernández-de-las-Peñas<sup>3</sup> PT, PhD, DMSc

### Affiliations

- (1) Department of Psychology, Universidad Rey Juan Carlos, Alcorcón, Spain
- (2) Departamento Psicología Evolutiva y de la Educación, Universitat Valencia, Spain
- (3) Department of Physical Therapy, Occupational Therapy, Rehabilitation and Physical Medicine, Universidad Rey Juan Carlos, Alcorcón, Spain
- (4) Department of Nursing, Universidad de Cantabria, Spain

### Address for reprint requests / corresponding author.

César Fernández de las Peñas  
Facultad de Ciencias de la Salud  
Universidad Rey Juan Carlos  
Avenida de Atenas s/n  
28922 Alcorcón, Madrid  
SPAIN  
E-mail address: [cesar.fernandez@urjc.es](mailto:cesar.fernandez@urjc.es)

Telephone number: + 34 91 488 88 84

Fax number: + 34 91 488 89 57

**Total word account:** 2,410 words

**Running title:** Depression, quality of life and fatigue in multiple sclerosis

**Disclosure of Conflict of Interest:** The authors declare no conflicts of interest with the content of this article. No funds were received for the study.

**Keywords:** multiple sclerosis, depression, fatigue, quality of life.

## Abstract

**Objectives:** To determine the direct and indirect effects of depression and health-related quality of life on fatigue in multiple sclerosis (MS). **Design:** A cross-sectional study. **Setting:** Tertiary urban hospital. **Participants:** One hundred and eight patients (54% women) with definite MS participated. **Outcome measures:** Demographic and clinical data (weight, height, medication, and neurological impairment), fatigue (Fatigue Impact Scale - FIS), depression (Beck Depression Inventory - BDI/II) and health-related quality of life (Short-Form Health Survey 36-SF36) were assessed. Correlation and path model analysis with maximum likelihood estimations were conducted to assess the direct and indirect effects of depression on health-related quality of life and MS-related fatigue. **Results:** Fatigue was negative associated with bodily pain, physical function and mental health, and positive associated with depression. Depression was negatively associated with bodily pain and mental health. The path analysis found direct effect from physical function, bodily pain and depression to fatigue (all,  $P < 0.01$ ). The path model analysis revealed that depression exerted an indirect effect from bodily pain to fatigue ( $B = -0.04$ ,  $P < 0.01$ ) and from mental health to fatigue ( $B = -0.16$   $P < 0.01$ ). The amount of fatigue explained by all predictors in the path model was 37%. **Conclusions:** Our study found that depression mediates the relationship between some health-related quality of life domains and fatigue in people with MS. Future longitudinal studies focusing on proper management of depressive symptoms in individuals with MS will help to determine the clinical implications of these findings.

**Keywords:** multiple sclerosis, depression, fatigue, quality of life.

## Strengths and limitations of this study

- Depression mediated the relationship between mental health and bodily pain with fatigue in a sample of people with multiple sclerosis.
- Clinicians should be aware that depression was directly related with fatigue and that can indirectly mediate the effects of health-related quality of life in MS.
- Early identification and proper management of depression should be clinically considered in patients with multiple sclerosis.
- This was a cross-sectional study; therefore, cause and effect relationships cannot be inferred.
- The sample was composed of patients with multiple sclerosis recruited from different urban hospitals, not from the general population
- Some potential variables such as anxiety or sleep disturbances which could give a broader vision of the biopsychosocial model approach were not included

## Conflict of Interest

The authors declare no conflicts of interest with the content of this article.

## Funding

No funds were received for the study.

## Patient consent

Obtained

## Ethics approval

This study was approved by the local ethical research committee of the Hospital Universitario Fundación Alcorcón, Madrid, Spain

# Direct and Indirect Effects of Depression and Health-Related Quality of Life on Fatigue in Patients with Multiple Sclerosis

## Introduction

Multiple sclerosis (MS) is a chronic demyelizing disease of the central nervous system including a variety of symptoms which interfere with daily life activities, social, and working life, disturb emotional well-being and reduce quality of life. A recent study has reported a worldwide incidence of 5.2 per 100,000 person-years and a prevalence of 112 per 100,000 person-years for MS.<sup>1</sup>

Among all symptoms experienced by people with MS, fatigue is probably one of the most disabling.<sup>2</sup> The prevalence of fatigue in MS ranges from 53% to 80%.<sup>3</sup> Fatigue is a risk indicator for conversion to confirmed moderate-severe disability in relapsing-remitting MS.<sup>4</sup> In fact, fatigue is a complex symptom influenced by several aspects such as psychological status, social relationships, personal beliefs, as well as interaction with environment.<sup>5</sup> Among all potential relationships, depression and health-related quality of life are those aspects showing more impact on fatigue in people with MS.

Depression is the most prevalent comorbid situation reported by individuals with MS.<sup>6,7</sup> A recent study found that the presence of depression is an important determinant of cognitive performance in subjects with MS.<sup>8</sup> In fact, the relationship between fatigue and depression is bidirectional: fatigue can promote the development of depression, but depression may also contribute to worse self-perceived fatigue. Nevertheless, the results from current literature are somehow conflicting. Bakshi et al reported that fatigue was associated with depression independently of disability.<sup>9</sup> In the same direction, a recent study has shown that fatigue and sleep disturbances may contribute to the development

1 of depression.<sup>10</sup> Other authors have investigated the opposite, the role of depression in  
2 fatigue. Kroencke et al found that depressed mood was a significant predictor of fatigue  
3  
4  
5  
6 accounting for approximately 23% of its variance.<sup>11</sup> Nevertheless, others have reported  
7  
8  
9 that depression is independently related to the presence of fatigue.<sup>12</sup> Due to multiple  
10  
11 interactions between depression and fatigue can exist, more studies are needed.  
12

13 Finally, fatigue and depression can also influence self-perceived quality of life.  
14  
15 Tanriverdi et al observed that fatigue and depression strongly influence quality of life in  
16  
17 MS.<sup>13</sup> A recent study has reported that depression and fatigue, in addition to disability  
18  
19 and physical co-morbidities, were associated with health-related quality of life in people  
20  
21 with MS.<sup>14</sup> Further research investigating the association between depression, health-  
22  
23 related quality of life and fatigue in MS is needed. In fact, a better understanding of the  
24  
25 possible interaction between these multidimensional aspects associated with fatigue can  
26  
27 potentially assist clinicians in determining better therapeutic programs for individuals  
28  
29 with MS. Therefore, the aim of the current study was to further determine the direct and  
30  
31 indirect effects of depression and health-related quality of life on fatigue in people with  
32  
33 MS. We hypothesized that relationships between health-related quality of life variables  
34  
35 and fatigue would be mediated by depressive symptoms.  
36  
37  
38  
39  
40  
41  
42  
43  
44  
45  
46  
47  
48  
49  
50  
51  
52  
53  
54  
55  
56  
57  
58  
59  
60

## Methods

Patients diagnosed with definite MS according to the modified McDonald criteria<sup>15</sup> by experienced neurologists were screened for eligibility criteria. The exclusion criteria included comorbid neurological diseases including herniated disk and other disorders of the spine, renal diseases, cancer, diabetes mellitus, other psychiatric diseases and a Mini Mental State Examination score < 25.<sup>16</sup> Written informed consent was obtained from all participants prior to their inclusion in the study. The study design was approved by the Ethics Committee of Hospital Universitario Fundación Alcorcón (HUFA 11/087) in Madrid (Spain). All procedures were conducted according to the Declaration of Helsinki

Patients were recruited during their routine neurological visits and were screened and explored during a stationary phase of the disease. Patients completed a demographic and clinical questionnaire including age, sex, weight, height, medication, and history of pain, if existed. All participants underwent a neurological examination and neurological impairment was rated with the Expanded Disability Status Scale (EDSS).<sup>17</sup>

### Multiple Sclerosis Related Fatigue

MS-related fatigue was assessed with the Fatigue Impact Scale (FIS).<sup>18</sup> The FIS consists of a 40-items questionnaire including 3 subscales assessing the impact of self-perceived fatigue on cognitive functioning (10 items), physical functioning (10 items), and psychosocial functioning (20 items). Patients rate on a 5 points Likert scale if fatigue causes problems during the previous month (0: no problem; 4: extreme problem). The total score ranges from 0 to 84 points, where higher scores represent higher level of self-rated fatigue. This questionnaire has obtained good test-retest reliability and validity in MS.<sup>19</sup>



## Depression

Depression was assessed with the Beck Depression Inventory (BDI-II). It consists of 21-items assessing affective, cognitive and somatic symptoms of depression.<sup>20</sup> Patients choose from a group of sentences which best described how they had been feeling in the preceding two weeks. The score ranges from 0 to 21 points where higher score suggests higher level of depressive symptoms.<sup>21</sup> This questionnaire has exhibited good internal consistency and good convergent and divergent validity in MS.<sup>22</sup>

## Health-Related Quality of life

The Short-Form Health Survey 36 (SF-36) was used to assess health-related quality of life. This questionnaire assesses 8 domains including physical function, physical role, bodily pain, general health, vitality, social function, role-emotional, and mental health.<sup>23</sup> Each domain is standardized on scores ranging from 0 to 100points where higher scores represent better quality of life. The SF-36 has shown the ability to discriminate between individuals with health problems and healthy people.<sup>24,25</sup>

## Statistical analysis

Means, standard deviations, and confidence intervals were calculated to describe the sample. The Kolmogorov-Smirnov test revealed that all quantitative data exhibited a normal distribution. To determine the relationship between fatigue and the remaining variables, i.e., depression and health-related quality of life domains, different Pearson product-moment correlation coefficients were firstly assessed.

Secondly, a path model with maximum likelihood estimation was conducted to evaluate the direct and indirect effects of depression between the variables using AMOS computer program.<sup>26</sup> A path model is a diagram relating independent, intermediary, and dependent variables.<sup>27</sup> In the hypothesized model, fatigue was the dependent variable,

1 quality of life domains (independent outcomes) were the predictors of depression, and  
2 depression (intermediate variable) was a predictor of fatigue. In a path analysis, single  
3 arrows indicate causation between intermediary and dependent variable. Further, arrows  
4 also connect the error terms with their respective intermediary variables. Double arrows  
5 indicate correlation between pairs of independent variables. The path coefficient is a  
6 standardized regression coefficient (beta) showing the direct effect of an independent  
7 variable (health-related quality of life) on a dependent (fatigue) variable. These path  
8 coefficients may be used to decompose correlations in the model into direct and indirect  
9 effects, corresponding to direct and indirect path reflected in the arrows in the model.  
10 Indirect effects occur when the relationship between 2 variables (e.g. fatigue and mental  
11 health) is mediated by one or more variables (i.e., depression).  
12  
13  
14  
15  
16  
17  
18  
19  
20  
21  
22  
23  
24

25 Previous conditions from data were assessed: linearity, additivity, interval level  
26 data, recursivity, low multicollinearity and adequate sample size.<sup>28</sup> Confirmation of the  
27 adequacy of the model was conducted within absolute fit indices.<sup>29,30</sup> AMOS provides  
28 several fit indices that are largely independent of the sample size: the chi-square statistic  
29 ( $X^2$ );<sup>31</sup> the goodness of fit index (GFI) and adjusted goodness of fit index (AGFI)  
30 whose value reference is at 90 to consider an acceptable model,<sup>32</sup> and the Comparative  
31 Fit Index (CFI), Normed Fit Index (NFI) and Tucker-Lewis Index (TLI) which are also  
32 adequate if their values are over 0.90.<sup>33</sup> Finally, within parsimony adjustment indices,  
33 the error of the Root Mean Square Approximation (RMSEA) whose values < 0.08 or less  
34 are good.<sup>34</sup> Missing data were treated with maximum likelihood imputation.  
35  
36  
37  
38  
39  
40  
41  
42  
43  
44  
45  
46  
47  
48  
49  
50  
51  
52  
53  
54  
55  
56  
57  
58  
59  
60

## Results

One hundred and twenty (n=120) consecutive subjects with MS were screened for eligibility criteria. Finally, one hundred and eight (n=108, 90%), 54% women, mean age: 44±8 years; height: 170±9 cm; weight: 71±15 kg satisfied all the eligibility criteria, agreed to participate, and signed the informed consent. The reasons for exclusion were as follows: previous surgery (n=6), pregnancy (n=2), and older than 65 years old (n=4). Demographic and clinical data of the total sample are listed in **Table 1**.

### Correlation Analysis

**Table 2** shows the Pearson's correlation coefficients between variables included in the path model. Fatigue was significantly negative associated with bodily pain ( $r=-0.48$ ,  $P<0.01$ ), physical function ( $r=-0.31$ ,  $P<0.01$ ), and mental health ( $r=-0.42$ ,  $P<0.01$ ), and significantly positive associated with depression ( $r=0.47$ ,  $P<0.01$ ): the higher the self-perceived fatigue, the worse physical function and mental health, the higher bodily pain, or the higher depressive symptom. Depression was also negatively associated with bodily pain ( $r=-0.40$ ,  $P<0.01$ ) and mental health ( $r=-0.61$ ,  $P<0.01$ ): the worse mental health or higher presence of bodily pain, the higher the level of depression.

### Path analysis

The hypothesized model fit of the data was excellent with  $X^2=6.47$  -  $X^2/df=1.71$ ; Goodness of Fit Index (GFI): 0.98; Adjusted Goodness of Fit Index (AGFI): 0.91; Comparative Fit Index (CFI): 0.98; Tucker-Lewis Index: 0.94; Normed Fit Index: 0.97. Further, Root Mean Square Error of Approximation (RMSEA) was 0.08. **Fig. 1** displays the parameter estimates (standardized solution).

According to the direct effects, a significant path was noted from mental health ( $B=-.53$ ,  $P<0.01$ ) to depression. Likewise, significant paths were also indicated between physical function ( $B=-.23$ ,  $P<0.01$ ), bodily pain ( $B=-.36$ ,  $P<0.01$ ) and depression ( $B=$

.29,  $P < 0.01$ ) on fatigue. The direct effect from bodily pain on depression did not reach the significance ( $B = -.15$ ,  $P = 0.07$ ). Furthermore, significant indirect effects in the path analysis model from bodily pain to fatigue, exerted through depression ( $B = -.04$ ,  $P < 0.01$ ) and from mental health to fatigue, exerted through depression ( $B = -.16$ ,  $P < 0.01$ ) were observed. Overall, the amount of fatigue explained by all predictors in the model was  $R^2 = 0.37$ .

## Discussion

The present study demonstrated that depression mediates the relationship between some health-related quality of life domains, such as mental health and bodily pain, and fatigue in individuals with MS. These results support the assumption that depression is directly related with fatigue and that can indirectly mediate the effects of health-related quality of life in MS.

The findings from our study show, firstly, and in accordance with prior literature<sup>9-11</sup> that depression is a psychological factor directly associated with fatigue in people with MS. However, previous studies did not investigate the potential indirect effects of depression on other variables. Our study showed that depression indirectly mediated the association between some health-related quality of life domains, such as bodily pain and mental health, with fatigue, suggesting that depression contributes to worse perception of fatigue via these factors. The relevance of depression was further supported by the fact that we observed direct and indirect effects on self-perceived fatigue in our sample of subjects with MS, that is, depression has a direct influence on fatigue, but also other indirect influence on other outcomes. This finding is quite interesting if we consider that depression symptoms of our sample of people with MS was small since scores reflected minimal or mild signs of depression.<sup>21</sup> It is probable that higher levels of depression may reveal other relationships.

1 The association between mental health and fatigue in MS is not also new since  
2  
3 some studies have reported that fatigue contributes to mental fatigue, worse emotional  
4  
5 well-being, and worse cognitive performance.<sup>35,36</sup> The novelty of the current study was  
6  
7 that the effect of mental health on fatigue was indirectly mediated by depression. This is  
8  
9 an expected finding, since depression has been found to contribute to worse cognitive  
10  
11 performance.<sup>8</sup> It would be reasonable that MS patients suffering fatigue experience  
12  
13 worse cognitive function, which may in turn provoke depressive symptoms, and hence  
14  
15 increasing the self-perceived fatigue. Bidirectional reinforcement between mental health  
16  
17 and depression can create a vicious cycle by promoting self-perceived fatigue in people  
18  
19 with MS.  
20  
21  
22  
23

24 Another health-related quality of life domain which was directly associated with  
25  
26 fatigue was bodily pain. This seems to be expected since the presence of pain can also  
27  
28 contribute to fatigue.<sup>37</sup> Nevertheless, similarly than mental health, the effect of pain on  
29  
30 fatigue was indirectly mediated by depression. It can be hypothesized that pain induces  
31  
32 depression and that the latest will promote a worse fatigue self-perception. In fact, this  
33  
34 hypothesis has been supported by a study, which used a similar analysis that our study,  
35  
36 where higher pain levels were associated with fatigue, which in turn were associated  
37  
38 with higher depressive symptoms.<sup>38</sup> Current and previous findings suggest that proper  
39  
40 management of depressive symptoms would be a key element in the treatment of pain in  
41  
42 individuals with MS.  
43  
44  
45

46 The path model also identified that physical function was associated with self-  
47  
48 perceived fatigue in our sample of individuals with MS. In this case, the association of  
49  
50 physical function and fatigue was not mediated by depression, supporting a direct effect  
51  
52 between these variables. These findings agree with the results by Turpin et al who found  
53  
54 that MS patients with greater fatigue and disability exhibited poorer physical activity.<sup>39</sup>  
55  
56

1 Again, it is expected that subjects reporting greater fatigue has lower physical activity.  
2  
3 Nevertheless, this association could influence on other psychological outcomes included  
4  
5 in our path, since fatigue may contribute to depression by reducing physical function as  
6  
7 the result of lack of energy.<sup>40</sup> These associations support a complex interaction between  
8  
9 physical outcomes, depressive symptoms, and fatigue.  
10  
11

12  
13       Uncertainty over biological mechanisms withstanding in these interactions, the  
14  
15 current results have important clinical implications. Our results indicate that depression,  
16  
17 that is, an emotional status, plays a relevant role in the relationship between fatigue and  
18  
19 health-related quality of life in people with MS. Therefore, current results suggest that  
20  
21 proper management of depression can be effective for improving self-perceived fatigue  
22  
23 in people with MS by acting on mental health and bodily pain. In such scenario, proper  
24  
25 management of fatigue by indirectly treating depressive symptoms would lead increase  
26  
27 of physical activity in these individuals. This hypothesis is supported by a recent review  
28  
29 reporting that psychological treatment produced improvement in both psychological and  
30  
31 physiological outcomes in patients with MS.<sup>41</sup>  
32  
33

34  
35       There are a number of limitations that should be recognized. First, we used a  
36  
37 cross-sectional design; therefore, cause and effect relationships between the variables  
38  
39 cannot be inferred. Second, the sample was composed of patients with MS recruited  
40  
41 from different urban hospitals. Therefore, extrapolation of our results to more diverse  
42  
43 populations should be conducted with caution. Finally, other potential variables such as  
44  
45 anxiety or sleep disturbances which could give a broader vision of the biopsychosocial  
46  
47 model approach were not included. This study would benefit from longitudinal data to  
48  
49 further determine the impact of proper management of depressive symptoms on the  
50  
51 identified associated factors over time in patients with MS.  
52  
53  
54  
55  
56

## Conclusions

This study found that depression mediated the relationship between mental health and bodily pain, but not the association of physical activity, and fatigue in people with MS. These results support the assumption that depression is directly related with fatigue and that can indirectly mediate the effects of health-related quality of life in MS. Future longitudinal studies will help to determine the clinical implications of these findings.

## Author contributions

All authors contributed to the study concept and design. JJFM and CFdIP did the main statistical analysis and interpretation of data. CFdIP and MCM contributed to draft the report. CFdIP obtained funding. MGC and ENP provided administrative, technical, and material support. ENP and MPHT supervised the study. All authors revised the text for intellectual content and have read and approved the final version of the manuscript.

## References

1. Melcon M, Correale J, Melcon C. Is it time for a new global classification of multiple sclerosis? *J Neurol Sci* 2014; 344: 171-181
2. Shah A. Fatigue in multiple sclerosis. *Phys Med Rehabil Clin N Am* 2009; 20: 363-7
3. Braley TJ, Chervin RD. Fatigue in multiple sclerosis: mechanisms, evaluation, and treatment. *Sleep* 2010; 33: 1061-7
4. Cavallari M, Palotai M, Glanz BI et al. Fatigue predicts disease worsening in relapsing-remitting multiple sclerosis patients. *Mult Scler* 2016; 22: 1841-1849.
5. Hadjimichael O, Vollmer T, Oleen-Burkey M; North American Research Committee on Multiple Sclerosis. Fatigue characteristics in multiple sclerosis: the North American Research Committee on Multiple Sclerosis (NARCOMS) survey. *Health Qual Life Outcomes* 2008; 6: 100
6. Marrie RA, Patten SB, Tremlett H, Wolfson C, Warren S, Svenson LW, Jette N, Fisk J; CIHR Team in the Epidemiology and Impact of Comorbidity on Multiple Sclerosis. Sex differences in comorbidity at diagnosis of multiple sclerosis: A population-based study. *Neurology* 2016 Mar 9. pii: 10.1212/WNL.0000000000002481.
7. Marrie RA, Reingold S, Cohen J, Stuve O, Trojano M, Sorensen PS, Cutter G, Reider N. The incidence and prevalence of psychiatric disorders in multiple sclerosis: a systematic review. *Mult Scler* 2015; 21: 305-17
8. Nunnari D, De Cola MC, D'Aleo G, Rifichi C, Russo M, Sessa E, Bramanti P, Marino S. Impact of depression, fatigue, and global measure of cortical volume on cognitive impairment in multiple sclerosis. *Biomed Res Int* 2015; 2015: 519785.



- 1  
2  
3  
4  
5  
6  
7  
8  
9  
10  
11  
12  
13  
14  
15  
16  
17  
18  
19  
20  
21  
22  
23  
24  
25  
26  
27  
28  
29  
30  
31  
32  
33  
34  
35  
36  
37  
38  
39  
40  
41  
42  
43  
44  
45  
46  
47  
48  
49  
50  
51  
52  
53  
54  
55  
56  
57  
58  
59  
60
9. Bakshi R, Shaikh ZA, Miletich RS, Czarnecki D, Dmochowski J, Henschel K, et al. Fatigue in multiple sclerosis and its relationship to depression and neurologic disability. *Mult Scler* 2000; 6:181-185
10. Edwards KA, Molton IR, Smith AE, Ehde DM, Bombardier CH, Battalio S, Jensen MP. The relative importance of baseline pain, fatigue, sleep and physical activity: Predicting change in depression in adults with multiple sclerosis. *Arch Phys Med Rehabil* 2016; 97: 1309-15.
11. Kroencke DC, Lynch SG, Denney DR. Fatigue in multiple sclerosis: relationship to depression, disability, and disease pattern. *Mult Scler* 2000; 6: 131-136.
12. Šabanagić-Hajrić S, Suljić E, Kučukalić A. Fatigue during multiple sclerosis relapse and its relationship to depression and neurological disability. *Psychiatr Danub* 2015; 27: 406-12
13. Tanriverdi D, Okanli A, Sezgin S, Ekinci M. Quality of life in patients with multiple sclerosis in Turkey: relationship to depression and fatigue. *J Neurosci Nurs* 2010; 42: 267-73.
14. Berrigan LI, Fisk JD, Patten SB, Tremlett H, Wolfson C, Warren S, Fiest KM, McKay KA, Marrie RA; CIHR Team in the Epidemiology and Impact of comorbidity on Multiple Sclerosis (ECoMS). Health-related quality of life in multiple sclerosis: Direct and indirect effects of comorbidity. *Neurology* 2016 pii: 10.1212/WNL.0000000000002564.
15. Yamout B, Alroughani R, Al-Jumah M et al Consensus guidelines for the diagnosis and treatment of multiple sclerosis. *Curr Med Res Opin* 2013; 29: 611-21

- 1  
2  
3  
4  
5  
6  
7  
8  
9  
10  
11  
12  
13  
14  
15  
16  
17  
18  
19  
20  
21  
22  
23  
24  
25  
26  
27  
28  
29  
30  
31  
32  
33  
34  
35  
36  
37  
38  
39  
40  
41  
42  
43  
44  
45  
46  
47  
48  
49  
50  
51  
52  
53  
54  
55  
56  
57  
58  
59  
60
16. Folstein MF, Folstein SE, McHugh PR. 'Mini-mental state': a practical method for grading the cognitive state of patients for the clinician. *J Psychiatr Res* 1975; 12: 189- 98
17. Kurtzke J. Rating neurologic impairment in multiple sclerosis: an Expanded Disability Status Scale (EDSS). *Neurology* 1983; 33: 1444-1452
18. Fisk JD, Ritvo PG, Ross L, Haase DA, Marrie TJ, Schlech WF. Measuring the functional impact of fatigue: initial validation of the fatigue impact scale. *Clin Infect Dis* 1994; 18: S79-83.
19. Mathiowetz V. Test-retest reliability and convergent validity of the Fatigue Impact Scale for persons with multiple sclerosis. *Am J Occup Ther* 2003; 57: 389-395
20. Beck AT, Steer RA, Brown GK. *Beck Depression Inventory*, 2nd ed. San Antonio, Texas; The Psychological Corporation, 1996
21. Beck AT, Steer RA, Garbin MG. Psychometric properties of the Beck Depression Inventory: twenty-five years of evaluation. *Clin Psychol Rev* 1988; 8: 77-100
22. Sacco R, Santangelo G, Stamenova S et al. Psychometric properties and validity of Beck Depression Inventory II in multiple sclerosis. *Eur J Neurol* 2016; 23: 744-50.
23. Ware JE Jr, Sherbourne CD. The MOS 36-item short-form health survey (SF-36). I. Conceptual framework and item selection. *Med Care* 1992; 30: 473-83
24. Ware JE, Snow KK, Kosinski M, Gandek B *SF-36 Health Survey: manual and interpretation guide*, Boston, MA: New England Medical Center, The Health Institute; 1993

- 1  
2 25. The Canadian Burden of Illness Study Group. Burden of illness of multiple  
3 sclerosis: part II: quality of life. *Can J Neurol Sci* 1998; 25: 31-38
- 4  
5 26. Abuckle JL, Wothke W. Amos 4.0 users guide. Chicago: Small waters; 1999.
- 6  
7 27. Duncan O. Path analysis: Sociological examples. *Am J Sociology* 1966; 72: 1-12
- 8  
9 28. Kline RB. Principles and practice of structural equation modeling (2nd ed.).  
10 New York: Guilford; 2005
- 11  
12 29. Jöreskog KG, Sörbom D. Advanced in factor analysis and structural equation  
13 models. Cambridge: M.A. Abl; 1979
- 14  
15 30. Bentler PM. Comparative fit indices in structural models. *Psychological Bull*  
16 1990; 107: 238-246
- 17  
18 31. Saris WE, Stronkhorst H. Casual modelling in non-experimental research: an  
19 introduction to the LISREL approach. Amsterdam: Sociometric Research  
20 Foundation; 1984.
- 21  
22 32. Hu L, Bentler PM. Cut-off criteria for fit indexes in covariance structure  
23 analysis: conventional criteria versus new alternatives. *Structural Equation Mod*  
24 1999; 6: 1-55.
- 25  
26 33. Bentler PM. Comparative fit indices in structural models. *Psychological Bull*  
27 1990; 107: 238-246
- 28  
29 34. Steiger JH, Lind C. Statistically based tests for the number of common factors.  
30 Paper presented at the annual meeting of the Psychometric Society, Iowa City,  
31 IA; 1980.
- 32  
33 35. Lerdal A, Gulowsen Celiusb E, Kruppc L, Dahl AA. A prospective study of  
34 patterns of fatigue in multiple sclerosis. *Eur J Neurol* 2007; 14: 1338-1343
- 35  
36  
37  
38  
39  
40  
41  
42  
43  
44  
45  
46  
47  
48  
49  
50  
51  
52  
53  
54  
55  
56  
57  
58  
59  
60

- 1  
2  
3  
4  
5  
6  
7  
8  
9  
10  
11  
12  
13  
14  
15  
16  
17  
18  
19  
20  
21  
22  
23  
24  
25  
26  
27  
28  
29  
30  
31  
32  
33  
34  
35  
36  
37  
38  
39  
40  
41  
42  
43  
44  
45  
46  
47  
48  
49  
50  
51  
52  
53  
54  
55  
56  
57  
58  
59  
60
36. Ukueberuwa DM, Arnett PA. Evaluating the role of coping style as a moderator of fatigue and risk for future cognitive impairment in multiple sclerosis. *J Int Neuropsychol Soc* 2014 Jul 7:1-5
37. Shahrbanian S, Duquette P, Ahmed S, Mayo NE. Pain acts through fatigue to affect participation in individuals with multiple sclerosis. *Qual Life Res* 2016; 25: 477-91
38. Amtmann D, Askew RL, Kim J, Chung H, Ehde D, Bombardier C et al. Pain affects depression through anxiety, fatigue, and sleep in multiple sclerosis. *Rehabil Psychol*. 2015; 60: 81-90
39. Turpin KV, Carroll LJ, Cassidy JD, Hader WJ. Deterioration in the health-related quality of life of persons with multiple sclerosis: the possible warning signs. *Mult Scler* 2007; 13: 1038-45
40. Penner IK, Bechtel N, Raselli C, Stöcklin M, Opwis K, Kappos L, Calabrese P. Fatigue in multiple sclerosis relation to depression, physical impairment, personality and action control. *Mult Scler* 2007; 13: 1161-1167
41. Pagnini F, Bosma CM, Phillips D, Langer E. Symptom changes in multiple sclerosis following psychological interventions: a systematic review. *BMC Neurol* 2014; 14: 222.

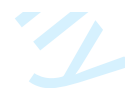

## Legend of Figure

**Figure 1:** Path analyses relating mental health, bodily pain and physical function with fatigue with the intermediate effect of depression. Standardized direct path coefficients are presented. In this model mental health predicts depression, while the independent variable (fatigue) is predicted by depression and also directly by physical activity. The straight arrows represent regression paths for presumed causal relationships, which the curved double-headed arrows represent assumed correlations among the variables.

**TABLE 1:** Demographics and specific disease clinical data for the total sample (n = 108)\*

|                                         |                         |
|-----------------------------------------|-------------------------|
| <b>Gender (male / female) n (%)</b>     | 49 (45%) / 59 (55%)     |
| <b>Age (years)</b>                      | 44 ± 8 (42 - 45)        |
| <b>Height (cm)</b>                      | 170 ± 9 (168-172)       |
| <b>Weight (kg)</b>                      | 71.5 ± 15 (68-75)       |
| <b>Disease course n, (%)</b>            |                         |
| Relapsing remitting                     | 80 (74%)                |
| Secondary progressive                   | 19 (18%)                |
| Primary progressive                     | 8 (8%)                  |
| <b>Disease duration (years)</b>         | 12.5 ± 8.0 (11.0-14.2)  |
| <b>EDDS (0-10)</b>                      | 3.4 ± 1.7 (3.1-3.8)     |
| <b>FIS (total score, 0-84)</b>          | 38.7 ± 19.2 (34.9-42.5) |
| <b>Physical Function (SF-36, 0-100)</b> | 55.5 ± 27.8 (49.9-60.9) |
| <b>Physical role (SF-36, 0-100)</b>     | 49.5 ± 40.7 (41.4-57.6) |
| <b>Bodily pain (SF-36, 0-100)</b>       | 66.2 ± 23.5 (62.5-70.8) |
| <b>General health (SF-36, 0-100)</b>    | 44.8 ± 21.1 (40.6-49.1) |
| <b>Vitality (SF-36, 0-100)</b>          | 44.9 ± 19.8 (40.9-48.8) |
| <b>Social function (SF-36, 0-100)</b>   | 71.2 ± 24.2 (66.4-76.0) |
| <b>Emotional role (SF-36, 0-100)</b>    | 78.3 ± 35.9 (71.2-85.4) |
| <b>Mental health (SF-36, 0-100)</b>     | 68.6 ± 16.4 (65.4-71.9) |
| <b>BDI - II (0-21)</b>                  | 10.2 ± 6.7 (8.8-11.5)   |

FIS: Fatigue Impact Scale; EDSS: Expanded Disability Status Scale; BDI - II: Beck Depression Inventory

\*Data are mean ± SD (95% confidence interval).

**TABLE 2:** Pearson-Product Moment Correlation Matrix for the Study Variables Included in the Path Model

|                              | Mean | SD   | 95%CI       | Kurtosis | Skewness | 1       | 2       | 3     | 4       |
|------------------------------|------|------|-------------|----------|----------|---------|---------|-------|---------|
| 1. Fatigue (FIS, 0-84)       | 38.7 | 19.2 | 34.9 - 42.5 | -.48     | .22      |         |         |       |         |
| 2. Bodily pain (0-100)       | 66.2 | 23.5 | 62.5 - 70.8 | -.46     | -.28     | -.488** |         |       |         |
| 3. Physical function (0-100) | 55.5 | 27.8 | 49.9 - 60.9 | -1.20    | .00      | -.308** | .072    |       |         |
| 4. Mental Health (0-100)     | 68.6 | 16.4 | 65.4 - 71.9 | -.70     | -.15     | -.424** | .468**  | .106  |         |
| 5. Depression (0-21)         | 10.2 | 6.7  | 8.8 - 11.5  | .33      | .72      | .475**  | -.403** | -.184 | -.606** |

SD: Standard deviation; 95%CI: 95% confidence interval

<sup>1</sup> Skewness standard error = .23; <sup>2</sup> Kurtosis standard error = .46: \*\* P<.01; \*P<.05 (two tailed)

1  
2  
3  
4  
5  
6  
7  
8  
9  
10  
11  
12  
13  
14  
15  
16  
17  
18  
19  
20  
21  
22  
23  
24  
25  
26  
27  
28  
29  
30  
31  
32  
33  
34  
35  
36  
37  
38  
39  
40  
41  
42  
43  
44  
45  
46  
47  
48  
49  
50  
51  
52  
53  
54  
55  
56  
57  
58  
59  
60

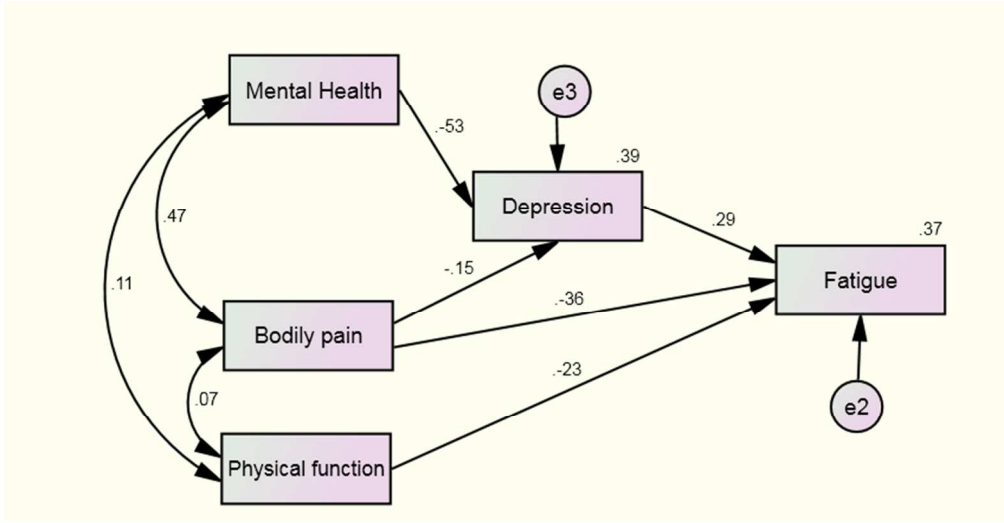

er review only



**STROBE 2007 (v4) Statement—Checklist of items that should be included in reports of *cross-sectional studies***

| Section/Topic                | Item # | Recommendation                                                                                                                                                                       | Reported on page # |
|------------------------------|--------|--------------------------------------------------------------------------------------------------------------------------------------------------------------------------------------|--------------------|
| Title and abstract           | 1      | (a) Indicate the study’s design with a commonly used term in the title or the abstract                                                                                               | 1                  |
|                              |        | (b) Provide in the abstract an informative and balanced summary of what was done and what was found                                                                                  | 2                  |
| <b>Introduction</b>          |        |                                                                                                                                                                                      |                    |
| Background/rationale         | 2      | Explain the scientific background and rationale for the investigation being reported                                                                                                 | 4-5                |
| Objectives                   | 3      | State specific objectives, including any pre-specified hypotheses                                                                                                                    | 5                  |
| <b>Methods</b>               |        |                                                                                                                                                                                      |                    |
| Study design                 | 4      | Present key elements of study design early in the paper                                                                                                                              | 6                  |
| Setting                      | 5      | Describe the setting, locations, and relevant dates, including periods of recruitment, exposure, follow-up, and data collection                                                      | 6                  |
| Participants                 | 6      | (a) Give the eligibility criteria, and the sources and methods of selection of participants                                                                                          | 6                  |
| Variables                    | 7      | Clearly define all outcomes, exposures, predictors, potential confounders, and effect modifiers. Give diagnostic criteria, if applicable                                             | 6-7                |
| Data sources/<br>measurement | 8*     | For each variable of interest, give sources of data and details of methods of assessment (measurement). Describe comparability of assessment methods if there is more than one group | 6-7                |
| Bias                         | 9      | Describe any efforts to address potential sources of bias                                                                                                                            | 6-7                |
| Study size                   | 10     | Explain how the study size was arrived at                                                                                                                                            |                    |
| Quantitative variables       | 11     | Explain how quantitative variables were handled in the analyses. If applicable, describe which groupings were chosen and why                                                         | 6-7                |
| Statistical methods          | 12     | (a) Describe all statistical methods, including those used to control for confounding                                                                                                | 7-8                |
|                              |        | (b) Describe any methods used to examine subgroups and interactions                                                                                                                  | 7-8                |
|                              |        | (c) Explain how missing data were addressed                                                                                                                                          | 7-8                |
|                              |        | (d) If applicable, describe analytical methods taking account of sampling strategy                                                                                                   | 7-8                |
|                              |        | (e) Describe any sensitivity analyses                                                                                                                                                | 7-8                |

|                          |     |                                                                                                                                                                                                              |                       |
|--------------------------|-----|--------------------------------------------------------------------------------------------------------------------------------------------------------------------------------------------------------------|-----------------------|
| <b>Results</b>           |     |                                                                                                                                                                                                              |                       |
| Participants             | 13* | (a) Report numbers of individuals at each stage of study—eg numbers potentially eligible, examined for eligibility, confirmed eligible, included in the study, completing follow-up, and analysed            | 9                     |
|                          |     | (b) Give reasons for non-participation at each stage                                                                                                                                                         | 9                     |
|                          |     | (c) Consider use of a flow diagram                                                                                                                                                                           |                       |
| Descriptive data         | 14* | (a) Give characteristics of study participants (eg demographic, clinical, social) and information on exposures and potential confounders                                                                     | 9, table 1            |
|                          |     | (b) Indicate number of participants with missing data for each variable of interest                                                                                                                          |                       |
| Outcome data             | 15* | Report numbers of outcome events or summary measures                                                                                                                                                         | 9-10, table 2, Fig. 1 |
| Main results             | 16  | (a) Give unadjusted estimates and, if applicable, confounder-adjusted estimates and their precision (eg, 95% confidence interval). Make clear which confounders were adjusted for and why they were included | 9-10, table 2, Fig. 1 |
|                          |     | (b) Report category boundaries when continuous variables were categorized                                                                                                                                    |                       |
|                          |     | (c) If relevant, consider translating estimates of relative risk into absolute risk for a meaningful time period                                                                                             |                       |
| Other analyses           | 17  | Report other analyses done—eg analyses of subgroups and interactions, and sensitivity analyses                                                                                                               |                       |
| <b>Discussion</b>        |     |                                                                                                                                                                                                              |                       |
| Key results              | 18  | Summarise key results with reference to study objectives                                                                                                                                                     | 10                    |
| Limitations              | 19  | Discuss limitations of the study, taking into account sources of potential bias or imprecision. Discuss both direction and magnitude of any potential bias                                                   | 12                    |
| Interpretation           | 20  | Give a cautious overall interpretation of results considering objectives, limitations, multiplicity of analyses, results from similar studies, and other relevant evidence                                   | 10-12                 |
| Generalisability         | 21  | Discuss the generalisability (external validity) of the study results                                                                                                                                        | 10-12                 |
| <b>Other information</b> |     |                                                                                                                                                                                                              |                       |
| Funding                  | 22  | Give the source of funding and the role of the funders for the present study and, if applicable, for the original study on which the present article is based                                                | N/A                   |

\*Give information separately for cases and controls in case-control studies and, if applicable, for exposed and unexposed groups in cohort and cross-sectional studies.

**Note:** An Explanation and Elaboration article discusses each checklist item and gives methodological background and published examples of transparent reporting. The STROBE checklist is best used in conjunction with this article (freely available on the Web sites of PLoS Medicine at <http://www.plosmedicine.org/>, Annals of Internal Medicine at <http://www.annals.org/>, and Epidemiology at <http://www.epidem.com/>). Information on the STROBE Initiative is available at [www.strobe-statement.org](http://www.strobe-statement.org).

# BMJ Open

## The Association between Health-Related Quality of Life and Fatigue is Indirectly Mediated by Depression in Patients with Multiple Sclerosis: A Cross Sectional Study

|                                 |                                                                                                                                                                                                                                                                                                                                                                                                                                                                                                                                                                              |
|---------------------------------|------------------------------------------------------------------------------------------------------------------------------------------------------------------------------------------------------------------------------------------------------------------------------------------------------------------------------------------------------------------------------------------------------------------------------------------------------------------------------------------------------------------------------------------------------------------------------|
| Journal:                        | <i>BMJ Open</i>                                                                                                                                                                                                                                                                                                                                                                                                                                                                                                                                                              |
| Manuscript ID                   | bmjopen-2017-016297.R1                                                                                                                                                                                                                                                                                                                                                                                                                                                                                                                                                       |
| Article Type:                   | Research                                                                                                                                                                                                                                                                                                                                                                                                                                                                                                                                                                     |
| Date Submitted by the Author:   | 22-Aug-2017                                                                                                                                                                                                                                                                                                                                                                                                                                                                                                                                                                  |
| Complete List of Authors:       | Fernández-Muñoz, Juan J; Universidad Rey Juan Carlos, Psychology<br>Cigarán-Méndez, Margarita; Universidad Rey Juan Carlos, Psychology<br>Navarro-Pardo, Esperanza; Universitat de Valencia, Psicología Evolutiva y de la Educación<br>Perez-de-Heredia, Marta; Universidad Rey Juan Carlos, Physiotherapy, Occupational Therapy, Rehabilitation and Physical Medicine.<br>Paras-Bravo, Paula; Universidad de Cantabria, Nursing<br>Fernández-de-las-Peñas, César; Universidad Rey Juan Carlos, Physical Therapy, Occupational Therapy, Rehabilitacion and Physical Medicine |
| <b>Primary Subject Heading</b>: | Neurology                                                                                                                                                                                                                                                                                                                                                                                                                                                                                                                                                                    |
| Secondary Subject Heading:      | Neurology                                                                                                                                                                                                                                                                                                                                                                                                                                                                                                                                                                    |
| Keywords:                       | Multiple sclerosis < NEUROLOGY, fatigue, Depression & mood disorders < PSYCHIATRY, quality of life                                                                                                                                                                                                                                                                                                                                                                                                                                                                           |
|                                 |                                                                                                                                                                                                                                                                                                                                                                                                                                                                                                                                                                              |

SCHOLARONE™  
Manuscripts

1  
2  
3  
4 **The Association between Health-Related Quality of Life and Fatigue is**  
5 **Indirectly Mediated by Depression in Patients with Multiple Sclerosis:**  
6  
7 **A Cross Sectional Study**  
8  
9

10  
11 **Authors**

12 Juan J. Fernández-Muñoz<sup>1</sup> PhD; Margarita Cigarán-Méndez<sup>1</sup> PhD; Esperanza Navarro-  
13 Pardo<sup>2</sup> PhD; Marta Pérez-de-Heredia-Torres<sup>3</sup> PhD; Paula Parás-Bravo<sup>4</sup> PT; César  
14 Fernández-de-las-Peñas<sup>3</sup> PT, PhD, DMSc  
15  
16  
17  
18

19 **Affiliations**

- 20  
21 (1) Department of Psychology, Universidad Rey Juan Carlos, Alcorcón, Spain  
22 (2) Departamento Psicología Evolutiva y de la Educación, Universitat Valencia, Spain  
23 (3) Department of Physical Therapy, Occupational Therapy, Rehabilitation and Physical  
24 Medicine, Universidad Rey Juan Carlos, Alcorcón, Spain  
25 (4) Department of Nursing, Universidad de Cantabria, Spain  
26  
27  
28  
29

30  
31 **Address for reprint requests / corresponding author.**

32  
33  
34 César Fernández de las Peñas  
35 Facultad de Ciencias de la Salud  
36 Universidad Rey Juan Carlos  
37 Avenida de Atenas s/n  
38 28922 Alcorcón, Madrid  
39 SPAIN  
40 E-mail address: [cesarfdlp@yahoo.es](mailto:cesarfdlp@yahoo.es)  
41  
42  
43

Telephone number: + 34 91 488 88 84

Fax number: + 34 91 488 89 57

44 **Total word account:** 2,677 words

45  
46 **Running title:** Depression, quality of life and fatigue in multiple sclerosis

47  
48 **Disclosure of Conflict of Interest:** The authors declare no conflicts of interest with the  
49 content of this article. No funds were received for the study.  
50  
51

52  
53 **Keywords:** multiple sclerosis, depression, fatigue, quality of life.  
54  
55

## Abstract

**Objectives:** To determine the direct and indirect effects of depression on health-related quality of life on fatigue in multiple sclerosis (MS). **Design:** A cross-sectional study. **Setting:** Tertiary urban hospital. **Participants:** One hundred and eight patients (54% women) with definite MS participated. **Outcome measures:** Demographic and clinical data (weight, height, medication, and neurological impairment), fatigue (Fatigue Impact Scale - FIS), depression (Beck Depression Inventory - BDI/II) and health-related quality of life (Short-Form Health Survey 36-SF36) were assessed. Correlation and path model analysis with maximum likelihood estimations were conducted to assess the direct and indirect effects of depression on health-related quality of life and MS-related fatigue. **Results:** Fatigue was associated with bodily pain, physical function and mental health, and with depression. Depression was associated with bodily pain and mental health. The path analysis found direct effect from physical function, bodily pain and depression to fatigue (all,  $P < 0.01$ ). The path model analysis revealed that depression exerted an indirect effect from bodily pain to fatigue ( $B = -0.04$ ,  $P < 0.01$ ) and from mental health to fatigue ( $B = -0.16$ ,  $P < 0.01$ ). The amount of fatigue explained by all predictors in the path model was 37%. **Conclusions:** The current study found that depression mediates the relationship between some health-related quality of life domains and fatigue in people with MS. Future longitudinal studies focusing on proper management of depressive symptoms in individuals with MS will help to determine the clinical implications of these findings.

**Keywords:** multiple sclerosis, depression, fatigue, quality of life.

## Strengths and limitations of this study

- This study using a path model with restrictive indexes observed that depression levels mediated the relationship between mental health and bodily pain with fatigue in a sample of 108 individuals with multiple sclerosis.
- Clinicians should be aware that depression was directly related with fatigue and that can indirectly mediate the effects of health-related quality of life in multiple sclerosis; early identification and management of depression should be clinically considered in this population.
- Since this was a cross-sectional study, cause and effect relationships cannot be inferred. In addition, the sample was composed of patients recruited from urban hospitals, not from the general population
- The level of depressive symptoms in this sample of patients exhibiting multiple sclerosis was lower than expected, so we do not know if the presence of higher symptoms of depression can lead to further associations or effects.

## Conflict of Interest

The authors declare no conflicts of interest with the content of this article.

## Funding

No funds were received for the study.

## Patient consent

Obtained

## Ethics approval

This study was approved by the local ethical research committee of the Hospital Universitario Fundación Alcorcón, Madrid, Spain

# The Association between Health-Related Quality of Life and Fatigue is Indirectly Mediated by Depression in Patients with Multiple Sclerosis: A Cross Sectional Study

## Introduction

Multiple sclerosis (MS) is a chronic demyelinating disease of the central nervous system including a variety of symptoms, which interfere with daily life activities, social, and working life, disturb emotional well-being, and reduce quality of life. It has been reported a worldwide annual incidence of 5.2 per 100,000 persons and an prevalence of 112 cases per 100,000 habitants.<sup>1</sup> In Spain, the prevalence of MS has been found to be 125 cases/100,000 habitants;<sup>2</sup> however, some recent studies have observed an increased prevalence in the last decade.<sup>3,4</sup>

Among all symptoms experienced by people with MS, fatigue is probably one of the most disabling.<sup>5</sup> The prevalence of fatigue in MS ranges from 53% to 80%.<sup>6</sup> Fatigue is a risk indicator for conversion from moderate-severe disability to relapsing-remitting MS.<sup>7</sup> In fact, fatigue is influenced by several aspects such as psychological status, social relationships, personal beliefs, as well as personal interaction with environment.<sup>8</sup> Among all potential relationships, depression and health-related quality of life are those aspects showing more impact on fatigue in people with MS.<sup>9,10</sup>

Depression is the most prevalent comorbid situation reported by individuals with MS.<sup>11,12</sup> It has been recently reported that the presence of depression is an important determinant of cognitive performance<sup>13</sup> and quality of life<sup>14</sup> in individuals with MS. In fact, the relationship between related-fatigue and depression is bidirectional: fatigue can promote depression, but depression may also contribute to worse self-perceived fatigue.

1  
2  
3  
4  
5  
6  
7  
8  
9  
10  
11  
12  
13  
14  
15  
16  
17  
18  
19  
20  
21  
22  
23  
24  
25  
26  
27  
28  
29  
30  
31  
32  
33  
34  
35  
36  
37  
38  
39  
40  
41  
42  
43  
44  
45  
46  
47  
48  
49  
50  
51  
52  
53  
54  
55  
56  
57  
58  
59  
60

Nevertheless, the results from current literature are sometimes conflicting. Bakshi et al observed that fatigue was associated with depression, but independently of disability.<sup>15</sup> Similarly, a recent study found that both fatigue and sleep disturbances contribute to the development of depression.<sup>16</sup> Other authors have investigated the role of depression on fatigue. Kroencke et al found that depressed mood was a significant predictor of fatigue accounting for approximately 23% of its variance.<sup>17</sup> Nevertheless; others reported that depression was not directly related to fatigue.<sup>18</sup>

Since depression and fatigue can be related through multiple interactions, more studies including other cofounders such as health-related quality of life are needed. In fact, fatigue and depression can also influence self-perceived quality of life. Tanriverdi et al observed that fatigue and depression strongly influence the quality of life in MS.<sup>19</sup> Some recent studies reported that depression and fatigue, as well as related-disability and physical co-morbidities, were associated with health-related quality of life in people with MS.<sup>9,10,20</sup> Further studies investigating the association between depression, health-related quality of life and fatigue in MS are needed. In fact, a better understanding of the possible interaction between these multidimensional aspects associated with fatigue can potentially assist clinicians in determining better therapeutic programs for individuals with MS. Therefore, the aim of the current study was to further determine the direct and indirect effects of depression on the association between health-related quality of life and fatigue in individuals with MS. Since depression is the psychological disorder most commonly experienced by subjects with MS;<sup>11,12</sup> we hypothesized that the relationships between health-related quality of life domains and related-fatigue would be mediated by depressive symptoms.



## Methods

Patients diagnosed with definite MS according to the modified McDonald criteria<sup>21</sup> by experienced neurologists, recruited from a local regional hospital in Madrid (Spain) between September 2013 and December 2014, were screened for eligibility criteria. The exclusion criteria included comorbid neurological diseases including herniated disk and other disorders of the spine, renal disease, cancer, diabetes mellitus, other psychiatric diseases and a Mini Mental State Examination score < 25.<sup>22</sup> Written informed consent was obtained from all participants prior to their inclusion in the study. The study design was approved by the Ethics Committee of Hospital Universitario Fundación Alcorcón (HUFA 11/087) in Madrid (Spain). All procedures were conducted according to the Declaration of Helsinki

Patients were recruited during their routine neurological visits and were screened and explored during a stationary phase of the disease. Patients completed a demographic and clinical questionnaire including age, sex, weight, height, medication, and history of pain, if existed. All participants underwent a neurological examination and neurological impairment was rated with the Expanded Disability Status Scale (EDSS).<sup>23</sup>

### Multiple Sclerosis Related Fatigue

MS-related fatigue was assessed with the Fatigue Impact Scale (FIS).<sup>24</sup> The FIS consists of a 40-items questionnaire including 3 subscales assessing the impact of self-perceived fatigue on cognitive functioning (10 items), physical functioning (10 items), and psychosocial functioning (20 items). Patients rate on a 5 points Likert scale if fatigue causes problems during the previous month (0: no problem; 4: extreme problem). The total score ranges from 0 to 84 points, where higher scores represent more fatigue. This questionnaire has exhibited good test-retest reliability and validity in people with MS.<sup>25</sup>

1  
2 In this study, the validated Spanish version of the FIS was used.<sup>26</sup> We considered as  
3  
4 main outcome the total FIS score.  
5

### 6 **Depression**

7  
8 Depression was assessed with the Beck Depression Inventory (BDI-II). It consists of  
9  
10 21-items assessing affective, cognitive and somatic symptoms of depression.<sup>27</sup> Patients  
11  
12 choose from a group of sentences which best describe how they had been feeling in the  
13  
14 preceding two weeks. The score ranges from 0 to 63 points where higher score suggests  
15  
16 higher level of depressive symptoms.<sup>28</sup> This questionnaire has exhibited good internal  
17  
18 consistency and good convergent and divergent validity in MS.<sup>29</sup>  
19  
20  
21

### 22 **Health-Related Quality of life**

23  
24 The Short-Form Health Survey 36 (SF-36) was used to assess health-related quality  
25  
26 of life. This questionnaire assesses 8 domains including physical function, physical role,  
27  
28 bodily pain, general health, vitality, social function, role-emotional, and mental health.<sup>30</sup>  
29  
30 Each domain is standardized on scores ranging from 0 to 100points where higher scores  
31  
32 represent better quality of life. The SF-36 has shown the ability to discriminate between  
33  
34 subjects with health problems and healthy people.<sup>31,32</sup> In the current study, the validated  
35  
36 Spanish version of the SF-36 questionnaire was used.<sup>33</sup>  
37  
38  
39  
40

### 41 **Statistical analysis**

42  
43 Means, standard deviations, and confidence intervals were calculated to describe  
44  
45 the sample. The Kolmogorov-Smirnov test revealed that all quantitative data exhibited a  
46  
47 normal distribution. To determine the relationship between fatigue and the remaining  
48  
49 variables, i.e., depression and health-related quality of life domains, different Pearson  
50  
51 product-moment correlation coefficients were firstly assessed.  
52  
53  
54  
55  
56  
57  
58  
59  
60

1  
2  
3  
4  
5  
6  
7  
8  
9  
10  
11  
12  
13  
14  
15  
16  
17  
18  
19  
20  
21  
22  
23  
24  
25  
26  
27  
28  
29  
30  
31  
32  
33  
34  
35  
36  
37  
38  
39  
40  
41  
42  
43  
44  
45  
46  
47  
48  
49  
50  
51  
52  
53  
54  
55  
56  
57  
58  
59  
60

Secondly, a path model with maximum likelihood estimation was conducted to evaluate the direct and indirect effects of depression between the variables significantly associated with fatigue using AMOS computer program.<sup>34</sup> A path model is a diagram relating independent, intermediary (mediating), and dependent (final) variables.<sup>35</sup> In our hypothesized model, fatigue was the dependent variable, health-related quality of life domains were the independent variables and depression the intermediate, predictor, of fatigue. In a path analysis, single arrows indicate causation between intermediary and dependent variable. Further, arrows also connect the error terms with their respective intermediary variables. Double arrows indicate correlation between pairs of independent variables. The path coefficient is a standardized regression coefficient (beta) showing the direct effect of an independent variable (health-related quality of life domain) on the dependent (fatigue) variable. Indirect effects occur when the relationship between two variables (e.g. fatigue and mental health) is mediated by one or more variables (i.e., depression).

Previous conditions from data were assessed: linearity, additivity, interval level data, recursivity, low multicollinearity and adequate sample size.<sup>36</sup> Confirmation of the adequacy of the model was conducted within absolute fit indices.<sup>37,38</sup> AMOS provides several fit indices that are largely independent of the sample size: the goodness of fit index (GFI) and adjusted goodness of fit index (AGFI) whose value reference is at 90 to consider an acceptable model;<sup>39</sup> and the Comparative Fit Index (CFI), Normed Fit Index (NFI) and Tucker-Lewis Index (TLI) which are also adequate if their values are over 0.90.<sup>40</sup> Finally, within parsimony adjustment indices, the error of the Root Mean Square Approximation (RMSEA) whose values < 0.08 or less are good.<sup>41</sup> Missing data were treated with maximum likelihood imputation. Missing data were removed to the

1 first recollected sample of participants, and just the sample was composed by the final  
2  
3  
4 subjects satisfying all inclusion criteria (n=108).  
5  
6  
7

## 8 **Results**

9

10 One hundred and twenty (n=120) consecutive subjects with MS were screened  
11 for eligibility criteria. Finally, one hundred and eight (n=108, 90%), 54% women, mean  
12 age: 44±8 years; height: 170±9 cm; weight: 71±15 kg satisfied all the eligibility criteria,  
13 agreed to participate, and signed the informed consent. The reasons for exclusion were  
14 as follows: previous surgery (n=6), pregnancy (n=2), and older than 65 years old (n=4).  
15  
16  
17  
18  
19  
20  
21 Demographic and clinical data of the total sample are listed in **Table 1**.  
22

## 23 **Correlation Analysis**

24

25  
26 **Table 2** shows the Pearson's correlation coefficients between variables included  
27 in the path model showing significant association with fatigue. Fatigue was significantly  
28 negative associated (higher score) with bodily pain ( $r=-0.48$ ,  $P<0.01$ ), physical function  
29 ( $r=-0.31$ ,  $P<0.01$ ) and mental health ( $r=-0.42$ ,  $P<0.01$ ), and also significantly positive  
30 associated with depression ( $r=0.47$ ,  $P<0.01$ ): the higher the self-perceived fatigue, the  
31 worse physical function, the worse mental health, the higher bodily pain, or the higher  
32 depressive symptom. Depression was also negatively associated with bodily pain ( $r=-$   
33  $0.40$ ,  $P<0.01$ ) and mental health ( $r=-0.61$ ,  $P<0.01$ ): the worse mental health or higher  
34 presence of bodily pain, the higher the level of depression.  
35  
36  
37  
38  
39  
40  
41  
42  
43  
44

## 45 **Path analysis**

46

47 The hypothesized model fit of the data was excellent with Goodness of Fit Index  
48 (GFI): 0.98; Adjusted Goodness of Fit Index (AGFI): 0.91; Comparative Fit Index  
49 (CFI): 0.98; Tucker-Lewis Index: 0.94; Normed Fit Index: 0.97. Further, Root Mean  
50  
51  
52  
53  
54  
55  
56  
57  
58  
59  
60

1 Square Error of Approximation (RMSEA) was 0.08. **Figure 1** displays the parameter  
2 estimates (standardized solution).  
3  
4

5  
6 According to the direct effects, a significant path was noted from mental health  
7 ( $B=-.53$ ,  $P<0.01$ ) to depression. Likewise, significant paths were also indicated between  
8 physical function ( $B=-.23$ ,  $P<0.01$ ), bodily pain ( $B=-.36$ ,  $P<0.01$ ) and depression ( $B=$   
9  $.29$ ,  $P<0.01$ ) on fatigue. The direct effect from bodily pain on depression did not reach  
10 the significance ( $B=-.15$ ,  $P=0.07$ ). Furthermore, significant indirect effects in the path  
11 analysis model from bodily pain to fatigue, exerted through depression ( $B=-.04$ ,  $P<0.01$ )  
12 and from mental health to fatigue, exerted through depression ( $B=-.16$   $P<0.01$ ) were  
13 observed. Overall, the amount of fatigue explained by all predictors in the model was  $R^2$   
14 = 0.37. All standard errors were between .035 and .070 with a confidence level of 95%.  
15  
16  
17  
18  
19  
20  
21  
22  
23  
24  
25  
26  
27

## 28 Discussion

29  
30 The present study demonstrated that depression mediates the relationship between  
31 some health-related quality of life domains, such as mental health and bodily pain, and  
32 fatigue in individuals with MS. These results support the assumption that depression is  
33 directly related with fatigue and that can indirectly mediate the effects of health-related  
34 quality of life in MS.  
35  
36  
37  
38  
39

40  
41 Our findings have shown, firstly, and in accordance with prior literature<sup>9,10 14-17</sup> that  
42 depression is a psychological factor directly associated with fatigue in people with MS.  
43 However, previous studies did not investigate the potential indirect effects of depression  
44 on the association between other variables. Our study showed that depression indirectly  
45 mediated the association between some health-related quality of life domains, such as  
46 bodily pain and mental health, with fatigue, suggesting that depressive levels mediate  
47 the contribution of quality of life to related-fatigue. The relevance of depression was  
48  
49  
50  
51  
52  
53  
54  
55

1 further supported by the fact depression have both direct and indirect effects on self-  
2 perceived fatigue in our sample of subjects with MS, that is, depression has a direct  
3 influence on fatigue, but also other indirect influence on other outcomes. This finding is  
4 quite interesting if we consider that depression symptoms of our sample of people with  
5 MS was small since scores reflected minimal or mild signs of depression.<sup>27</sup> It would be  
6 probable that higher levels of depression may reveal other relationships.  
7  
8  
9  
10  
11  
12  
13

14  
15 The association between mental health and fatigue in MS is not also new since  
16 some studies have reported that fatigue contributes to mental fatigue, worse emotional  
17 well-being, and worse cognitive performance.<sup>42,43</sup> The novelty of the current study was  
18 that the effect of mental health on fatigue was indirectly mediated by depression. This is  
19 an expected finding, since depression has been found to contribute to worse cognitive  
20 performance.<sup>13</sup> It would be reasonable that MS patients suffering fatigue experience  
21 worse cognitive function, which may in turn provoke depressive symptoms, and hence  
22 increasing the self-perceived fatigue. Bidirectional reinforcement between mental health  
23 and depression can create a vicious cycle by promoting self-perceived fatigue in people  
24 with MS.  
25  
26  
27  
28  
29  
30  
31  
32  
33  
34  
35  
36

37 Another health-related quality of life domain which was directly associated with  
38 fatigue was bodily pain. This seems to be expected since the presence of pain can also  
39 contribute to fatigue.<sup>44</sup> Nevertheless, similarly than mental health, the effect of pain on  
40 fatigue was indirectly mediated by depression. It can be hypothesized that pain induces  
41 depression and that the latest will promote a worse fatigue self-perception. In fact, this  
42 hypothesis has been supported by a study, which used a similar analysis that our study,  
43 where higher pain levels were associated with fatigue, which in turn were associated  
44 with higher depressive symptoms.<sup>45</sup> Current and previous findings suggest that proper  
45  
46  
47  
48  
49  
50  
51  
52  
53  
54  
55  
56  
57  
58  
59  
60

1 management of depressive symptoms would be a key element in the treatment of pain in  
2 individuals with MS; although further studies are needed.  
3  
4

5  
6 The path model also identified that physical function was associated with self-  
7 perceived fatigue in our sample of individuals with MS. In this case, the association of  
8 physical function and fatigue was not mediated by depression, supporting a direct effect  
9 between these variables. These findings agree with the results by Turpin et al who found  
10 that MS patients with greater fatigue and disability exhibited poorer physical activity.<sup>46</sup>  
11 Again, it is expected that subjects reporting greater fatigue have lower physical activity.  
12 Nevertheless, this association could influence on other psychological outcomes included  
13 in our path, since fatigue may contribute to depression by reducing physical function as  
14 the result of lack of energy.<sup>47</sup> These associations support a complex interaction between  
15 physical outcomes, depressive symptoms, and fatigue.  
16  
17  
18  
19  
20  
21  
22  
23  
24  
25  
26  
27

28 Uncertainty over biological mechanisms withstanding in these interactions, the  
29 current results have important clinical implications. Our results indicate that depression,  
30 that is, an emotional status, plays a relevant role in the relationship between fatigue and  
31 health-related quality of life in people with MS. Therefore, current results suggest that  
32 proper management of depression can be effective for improving self-perceived fatigue  
33 in people with MS by acting on mental health and bodily pain. In such scenario, proper  
34 management of fatigue by indirectly treating depressive symptoms would lead increase  
35 of physical activity in these individuals. This hypothesis is supported by a recent review  
36 reporting that psychological treatment produced improvement in both psychological and  
37 physiological outcomes in patients with MS.<sup>48</sup> Nevertheless; future randomized clinical  
38 trials are needed to confirm this hypothesis.  
39  
40  
41  
42  
43  
44  
45  
46  
47  
48  
49  
50  
51  
52  
53  
54  
55  
56  
57  
58  
59  
60

1  
2  
3  
4  
5  
6  
7  
8  
9  
10  
11  
12  
13  
14  
15  
16  
17  
18  
19  
20  
21  
22  
23  
24  
25  
26  
27  
28  
29  
30  
31  
32  
33  
34  
35  
36  
37  
38  
39  
40  
41  
42  
43  
44  
45  
46  
47  
48  
49  
50  
51  
52  
53  
54  
55  
56  
57  
58  
59  
60

There are a number of limitations that should be recognized. First, we used a cross-sectional design; therefore, cause and effect relationships between the variables cannot be inferred. Second, the sample was composed of patients with MS recruited from different urban hospitals. Therefore, extrapolation of the current results to more diverse populations should be conducted with caution. Further, we used a non-probabilistic sampling for a finite population for calculating our sample size. This was conducted applying a 95% confidence level and a sampling error for the final set of participants under 5%. Although we could not estimate a priori sample size, we believe that our sample is representative of the population. Third, the level of depressive symptoms in our sample of patients with MS was lower than expected. In fact, scores showed that almost all participants exhibited small depressive levels. It is possible that the presence of higher symptoms of depression can lead to further associations or effects. Fourth, we should consider that health-related quality of life was assessed with a general, but not disease-specific, questionnaire. It is possible that the use of a MS-specific quality of life questionnaire, i.e., MSQoL-54, would lead to other potential associations. Finally, other potential variables, such as anxiety or sleep disturbances, which could give a broader vision of the biopsychosocial model approach were not included. This study would benefit from longitudinal data to further determine the impact of proper management of depressive symptoms on the identified associations over time in patients with MS.



## Conclusions

This study found that depression mediated the relationship between mental health and bodily pain, but not the association of physical activity, and fatigue in people with MS. These results support the assumption that depression is directly related with fatigue and that can indirectly mediate the effects of health-related quality of life in MS. Future longitudinal studies will help to determine the clinical implications of these findings.

## Author contributions

All authors contributed to the study concept and design. JJFM and CFdIP did the main statistical analysis and interpretation of data. CFdIP and MCM contributed to draft the report. CFdIP obtained funding. MGC and ENP provided administrative, technical, and material support. ENP and MPHT supervised the study. All authors revised the text for intellectual content and have read and approved the final version of the manuscript.

## References

1. Melcon M, Correale J, Melcon C. Is it time for a new global classification of multiple sclerosis? *J Neurol Sci* 2014; 344: 171-181
2. Fernández O, Fernández V, Guerrero M et al E. Multiple sclerosis prevalence in Malaga, southern Spain estimated by the capture-recapture method. *Mult Scler* 2012; 18: 372-6.
3. Otero-Romero S, Roura P, Solà J et al. Increase in the prevalence of multiple sclerosis over a 17-year period in Osona, Catalonia, Spain. *Mult Scler* 2013; 19: 245-8.
4. Candelieri-Merlicco A, Valero-Delgado F, Martínez-Vidal S et al. Prevalence of multiple sclerosis in Health District III, Murcia, Spain. *Mult Scler Relat Disord* 2016; 9: 31-5.
5. Shah A. Fatigue in multiple sclerosis. *Phys Med Rehabil Clin N Am* 2009; 20: 363-7
6. Braley TJ, Chervin RD. Fatigue in multiple sclerosis: mechanisms, evaluation, and treatment. *Sleep* 2010; 33: 1061-7
7. Cavallari M, Palotai M, Glanz BI et al. Fatigue predicts disease worsening in relapsing-remitting multiple sclerosis patients. *Mult Scler* 2016; 22: 1841-1849.
8. Hadjimichael O, Vollmer T, Oleen-Burkey M; North American Research Committee on Multiple Sclerosis. Fatigue characteristics in multiple sclerosis: the North American Research Committee on Multiple Sclerosis (NARCOMS) survey. *Health Qual Life Outcomes* 2008; 6: 100
9. Nourbakhsh B, Julian L, Waubant E. Fatigue and depression predict quality of life in patients with early multiple sclerosis: a longitudinal study. *Eur J Neurol* 2016; 23: 1482-6.

- 1  
2  
3  
4  
5  
6  
7  
8  
9  
10  
11  
12  
13  
14  
15  
16  
17  
18  
19  
20  
21  
22  
23  
24  
25  
26  
27  
28  
29  
30  
31  
32  
33  
34  
35  
36  
37  
38  
39  
40  
41  
42  
43  
44  
45  
46  
47  
48  
49  
50  
51  
52  
53  
54  
55  
56  
57  
58  
59  
60
10. Kargarfard M, Eetemadifar M, Mehrabi M, Maghzi AH, Hayatbakhsh MR. Fatigue, depression, and health-related quality of life in patients with multiple sclerosis in Isfahan, Iran. *Eur J Neurol* 2012; 19: 431-7.
  11. Marrie RA, Patten SB, Tremlett H, Wolfson C, Warren S, Svenson LW, Jette N, Fisk J; CIHR Team in the Epidemiology and Impact of Comorbidity on Multiple Sclerosis. Sex differences in comorbidity at diagnosis of multiple sclerosis: A population-based study. *Neurology* 2016 Mar 9. pii: 10.1212/WNL.0000000000002481.
  12. Marrie RA, Reingold S, Cohen J, Stuve O, Trojano M, Sorensen PS, Cutter G, Reider N. The incidence and prevalence of psychiatric disorders in multiple sclerosis: a systematic review. *Mult Scler* 2015; 21: 305-17
  13. Nunnari D, De Cola MC, D'Aleo G, Rifichi C, Russo M, Sessa E, Bramanti P, Marino S. Impact of depression, fatigue, and global measure of cortical volume on cognitive impairment in multiple sclerosis. *Biomed Res Int* 2015; 2015: 519785.
  14. Friczka-Nagy Z, Füvesi J, Rózsa C, Komoly S, Jakab G, Csépany T et al. The effects of fatigue, depression and the level of disability on the health-related quality of life of glatiramer acetate-treated relapsing-remitting patients with multiple sclerosis in Hungary. *Mult Scler Relat Disord.* 2016; 7: 26-32.
  15. Bakshi R, Shaikh ZA, Miletich RS, Czarnecki D, Dmochowski J, Henschel K, et al. Fatigue in multiple sclerosis and its relationship to depression and neurologic disability. *Mult Scler* 2000; 6:181-185
  16. Edwards KA, Molton IR, Smith AE, Ehde DM, Bombardier CH, Battalio S, Jensen MP. The relative importance of baseline pain, fatigue, sleep and physical

- 1 activity: Predicting change in depression in adults with multiple sclerosis. Arch  
2  
3  
4 Phys Med Rehabil 2016; 97: 1309-15.  
5  
6 17. Kroencke DC, Lynch SG, Denney DR. Fatigue in multiple sclerosis: relationship  
7  
8 to depression, disability, and disease pattern. Mult Scler 2000; 6: 131-136.  
9  
10 18. Šabanagić-Hajrić S, Suljić E, Kučukalić A. Fatigue during multiple sclerosis  
11  
12 relapse and its relationship to depression and neurological disability. Psychiatr  
13  
14 Danub 2015; 27: 406-12  
15  
16 19. Tanriverdi D, Okanli A, Sezgin S, Ekinci M. Quality of life in patients with  
17  
18 multiple sclerosis in Turkey: relationship to depression and fatigue. J Neurosci  
19  
20 Nurs 2010; 42: 267-73.  
21  
22  
23 20. Berrigan LI, Fisk JD, Patten SB, Tremlett H, Wolfson C, Warren S, Fiest KM,  
24  
25 McKay KA, Marrie RA; CIHR Team in the Epidemiology and Impact of co-  
26  
27 morbidity on Multiple Sclerosis (ECoMS). Health-related quality of life  
28  
29 in multiple sclerosis: Direct and indirect effects of comorbidity. Neurology 2016  
30  
31 pii: 10.1212/WNL.0000000000002564.  
32  
33  
34 21. Polman CH, Reingold SC, Banwell B, et al. Diagnostic criteria for multiple  
35  
36 sclerosis: 2010 revisions to the McDonald criteria. Ann Neurol 2011; 69: 292-  
37  
38 302  
39  
40 22. Folstein MF, Folstein SE, McHugh PR. 'Mini-mental state': a practical method  
41  
42 for grading the cognitive state of patients for the clinician. J Psychiatr Res 1975;  
43  
44 12: 189- 98  
45  
46  
47 23. Kurtzke J. Rating neurologic impairment in multiple sclerosis: an Expanded  
48  
49 Disability Status Scale (EDSS). Neurology 1983; 33: 1444-1452  
50  
51  
52  
53  
54  
55  
56  
57  
58  
59  
60

- 1  
2  
3  
4  
5  
6  
7  
8  
9  
10  
11  
12  
13  
14  
15  
16  
17  
18  
19  
20  
21  
22  
23  
24  
25  
26  
27  
28  
29  
30  
31  
32  
33  
34  
35  
36  
37  
38  
39  
40  
41  
42  
43  
44  
45  
46  
47  
48  
49  
50  
51  
52  
53  
54  
55  
56  
57  
58  
59  
60
24. Fisk JD, Ritvo PG, Ross L, Haase DA, Marrie TJ, Schlech WF. Measuring the functional impact of fatigue: initial validation of the fatigue impact scale. *Clin Infect Dis* 1994; 18: S79-83.
25. Mathiowetz V. Test-retest reliability and convergent validity of the Fatigue Impact Scale for persons with multiple sclerosis. *Am J Occup Ther* 2003; 57: 389-395
26. Benito-León J, Martínez-Martín P, Frades B, et al (2007). Impact of fatigue in multiple sclerosis: The fatigue impact scale for daily use (D-FIS). *Mult Scler* 2007; 13: 645–651.
27. Beck AT, Steer RA, Brown GK. *Beck Depression Inventory*, 2nd ed. San Antonio, Texas; The Psychological Corporation, 1996
28. Beck AT, Steer RA, Garbin MG. Psychometric properties of the Beck Depression Inventory: twenty-five years of evaluation. *Clin Psychol Rev* 1988; 8: 77-100
29. Sacco R, Santangelo G, Stamenova S et al. Psychometric properties and validity of Beck Depression Inventory II in multiple sclerosis. *Eur J Neurol* 2016; 23: 744-50.
30. Ware JE Jr, Sherbourne CD. The MOS 36-item short-form health survey (SF-36). I. Conceptual framework and item selection. *Med Care* 1992; 30: 473-83
31. Ware JE, Snow KK, Kosinski M, Gandek B *SF-36 Health Survey: manual and interpretation guide*, Boston, MA: New England Medical Center, The Health Institute; 1993
32. The Canadian Burden of Illness Study Group. Burden of illness of multiple sclerosis: part II: quality of life. *Can J Neurol Sci* 1998; 25: 31-38

- 1  
2  
3  
4  
5  
6  
7  
8  
9  
10  
11  
12  
13  
14  
15  
16  
17  
18  
19  
20  
21  
22  
23  
24  
25  
26  
27  
28  
29  
30  
31  
32  
33  
34  
35  
36  
37  
38  
39  
40  
41  
42  
43  
44  
45  
46  
47  
48  
49  
50  
51  
52  
53  
54  
55  
56  
57  
58  
59  
60
33. Alonso J, Prieto L, Antó JM. [The Spanish version of the SF-36 Health Survey (the SF-36 health questionnaire): an instrument for measuring clinical results]. *Med Clin (Barc)* 1995; 104: 771-6.
34. Abuckle JL, Wothke W. *Amos 4.0 users guide*. Chicago: Small waters; 1999.
35. Duncan O. Path analysis: Sociological examples. *Am J Sociology* 1966; 72: 1-12
36. Kline RB. *Principles and practice of structural equation modeling* (2nd ed.). New York: Guilford; 2005
37. Jöreskog KG, Sörbom D. *Advanced in factor analysis and structural equation models*. Cambridge: M.A. Abl; 1979
38. Bentler PM. Comparative fit indices in structural models. *Psychological Bull* 1990; 107: 238-246
39. Hu L, Bentler PM. Cut-off criteria for fit indexes in covariance structure analysis: conventional criteria versus new alternatives. *Structural Equation Mod* 1999; 6: 1-55.
40. Bentler PM. Comparative fit indices in structural models. *Psychological Bull* 1990; 107: 238-246
41. Steiger JH, Lind C. Statistically based tests for the number of common factors. Paper presented at the annual meeting of the Psychometric Society, Iowa City, IA; 1980.
42. Lerdal A, Gulowsen Celiusb E, Kruppe L, Dahl AA. A prospective study of patterns of fatigue in multiple sclerosis. *Eur J Neurol* 2007; 14: 1338-1343

- 1  
2  
3  
4  
5  
6  
7  
8  
9  
10  
11  
12  
13  
14  
15  
16  
17  
18  
19  
20  
21  
22  
23  
24  
25  
26  
27  
28  
29  
30  
31  
32  
33  
34  
35  
36  
37  
38  
39  
40  
41  
42  
43  
44  
45  
46  
47  
48  
49  
50  
51  
52  
53  
54  
55  
56  
57  
58  
59  
60
43. Ukueberuwa DM, Arnett PA. Evaluating the role of coping style as a moderator of fatigue and risk for future cognitive impairment in multiple sclerosis. *J Int Neuropsychol Soc* 2014 Jul 7:1-5
44. Shahrbanian S, Duquette P, Ahmed S, Mayo NE. Pain acts through fatigue to affect participation in individuals with multiple sclerosis. *Qual Life Res* 2016; 25: 477-91
45. Amtmann D, Askew RL, Kim J, Chung H, Ehde D, Bombardier C et al. Pain affects depression through anxiety, fatigue, and sleep in multiple sclerosis. *Rehabil Psychol*. 2015; 60: 81-90
46. Turpin KV, Carroll LJ, Cassidy JD, Hader WJ. Deterioration in the health-related quality of life of persons with multiple sclerosis: the possible warning signs. *Mult Scler* 2007; 13: 1038-45
47. Penner IK, Bechtel N, Raselli C, Stöcklin M, Opwis K, Kappos L, Calabrese P. Fatigue in multiple sclerosis relation to depression, physical impairment, personality and action control. *Mult Scler* 2007; 13: 1161-1167
48. Pagnini F, Bosma CM, Phillips D, Langer E. Symptom changes in multiple sclerosis following psychological interventions: a systematic review. *BMC Neurol* 2014; 14: 222.

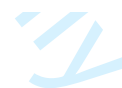

## Legend of Figure

**Figure 1:** Path analyses relating mental health, bodily pain and physical function with fatigue with the intermediate effect of depression. Standardized direct path coefficients are presented. In this model mental health predicts depression, while the independent variable (fatigue) is predicted by depression and also directly by physical activity. The straight arrows represent regression paths for presumed causal relationships, which the curved double-headed arrows represent assumed correlations among the variables.



**TABLE 1:** Demographics and specific disease clinical data for the total sample (n = 108)\*

|                                         |                         |
|-----------------------------------------|-------------------------|
| <b>Gender (male / female) n (%)</b>     | 49 (45%) / 59 (55%)     |
| <b>Age (years)</b>                      | 44 ± 8 (42 - 45)        |
| <b>Height (cm)</b>                      | 170 ± 9 (168-172)       |
| <b>Weight (kg)</b>                      | 71.5 ± 15 (68-75)       |
| <b>Disease course n, (%)</b>            |                         |
| Relapsing remitting                     | 80 (74%)                |
| Secondary progressive                   | 19 (18%)                |
| Primary progressive                     | 8 (8%)                  |
| <b>Disease duration (years)</b>         | 12.5 ± 8.0 (11.0-14.2)  |
| <b>EDDS (0-10)</b>                      | 3.4 ± 1.7 (3.1-3.8)     |
| <b>FIS (total score, 0-84)</b>          | 38.7 ± 19.2 (34.9-42.5) |
| <b>Physical Function (SF-36, 0-100)</b> | 55.5 ± 27.8 (49.9-60.9) |
| <b>Physical role (SF-36, 0-100)</b>     | 49.5 ± 40.7 (41.4-57.6) |
| <b>Bodily pain (SF-36, 0-100)</b>       | 66.2 ± 23.5 (62.5-70.8) |
| <b>General health (SF-36, 0-100)</b>    | 44.8 ± 21.1 (40.6-49.1) |
| <b>Vitality (SF-36, 0-100)</b>          | 44.9 ± 19.8 (40.9-48.8) |
| <b>Social function (SF-36, 0-100)</b>   | 71.2 ± 24.2 (66.4-76.0) |
| <b>Emotional role (SF-36, 0-100)</b>    | 78.3 ± 35.9 (71.2-85.4) |
| <b>Mental health (SF-36, 0-100)</b>     | 68.6 ± 16.4 (65.4-71.9) |
| <b>BDI - II (0-63)</b>                  | 10.2 ± 6.7 (8.8-11.5)   |

FIS: Fatigue Impact Scale; EDSS: Expanded Disability Status Scale; BDI - II: Beck Depression Inventory

\*Data are mean ± SD (95% confidence interval).

**TABLE 2:** Pearson-Product Moment Correlation Matrix for the Study Variables Included in the Path Model

|                              | Mean | SD   | 95%CI       | Kurtosis | Skewness | 1       | 2       | 3     | 4       |
|------------------------------|------|------|-------------|----------|----------|---------|---------|-------|---------|
| 1. Fatigue (FIS, 0-84)       | 38.7 | 19.2 | 34.9 - 42.5 | -.48     | .22      |         |         |       |         |
| 2. Bodily pain (0-100)       | 66.2 | 23.5 | 62.5 - 70.8 | -.46     | -.28     | -.488** |         |       |         |
| 3. Physical function (0-100) | 55.5 | 27.8 | 49.9 - 60.9 | -1.20    | .00      | -.308** | .072    |       |         |
| 4. Mental Health (0-100)     | 68.6 | 16.4 | 65.4 - 71.9 | -.70     | -.15     | -.424** | .468**  | .106  |         |
| 5. Depression (0-63)         | 10.2 | 6.7  | 8.8 - 11.5  | .33      | .72      | .475**  | -.403** | -.184 | -.606** |

SD: Standard deviation; 95%CI: 95% confidence interval

<sup>1</sup> Skewness standard error = .23; <sup>2</sup> Kurtosis standard error = .46: \*\* P<.01; \*P<.05 (two tailed)

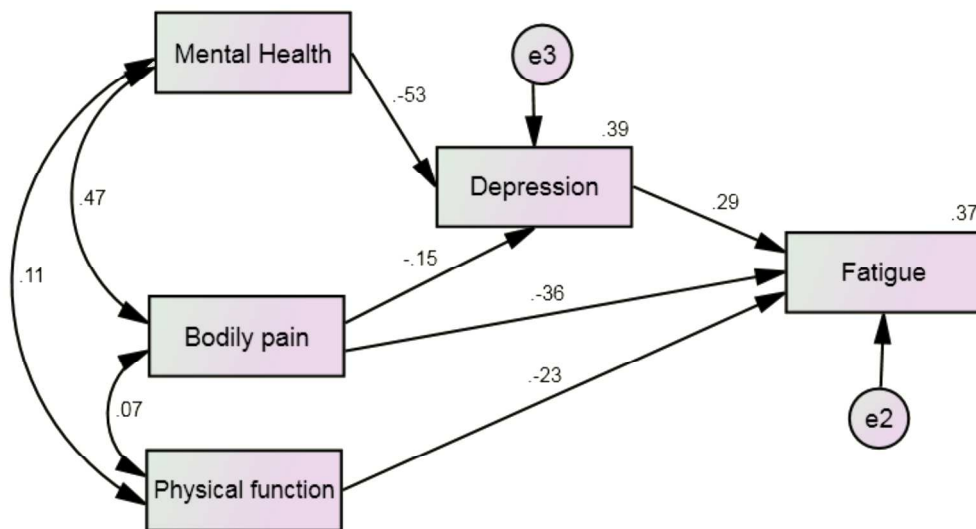

2500x1415mm (72 x 72 DPI)

Review only

**STROBE 2007 (v4) Statement—Checklist of items that should be included in reports of *cross-sectional studies***

| Section/Topic                | Item # | Recommendation                                                                                                                                                                       | Reported on page # |
|------------------------------|--------|--------------------------------------------------------------------------------------------------------------------------------------------------------------------------------------|--------------------|
| Title and abstract           | 1      | (a) Indicate the study's design with a commonly used term in the title or the abstract                                                                                               | 1                  |
|                              |        | (b) Provide in the abstract an informative and balanced summary of what was done and what was found                                                                                  | 2                  |
| <b>Introduction</b>          |        |                                                                                                                                                                                      |                    |
| Background/rationale         | 2      | Explain the scientific background and rationale for the investigation being reported                                                                                                 | 4-5                |
| Objectives                   | 3      | State specific objectives, including any pre-specified hypotheses                                                                                                                    | 5                  |
| <b>Methods</b>               |        |                                                                                                                                                                                      |                    |
| Study design                 | 4      | Present key elements of study design early in the paper                                                                                                                              | 6                  |
| Setting                      | 5      | Describe the setting, locations, and relevant dates, including periods of recruitment, exposure, follow-up, and data collection                                                      | 6                  |
| Participants                 | 6      | (a) Give the eligibility criteria, and the sources and methods of selection of participants                                                                                          | 6                  |
| Variables                    | 7      | Clearly define all outcomes, exposures, predictors, potential confounders, and effect modifiers. Give diagnostic criteria, if applicable                                             | 6-7                |
| Data sources/<br>measurement | 8*     | For each variable of interest, give sources of data and details of methods of assessment (measurement). Describe comparability of assessment methods if there is more than one group | 6-7                |
| Bias                         | 9      | Describe any efforts to address potential sources of bias                                                                                                                            | 6-7                |
| Study size                   | 10     | Explain how the study size was arrived at                                                                                                                                            | 13                 |
| Quantitative variables       | 11     | Explain how quantitative variables were handled in the analyses. If applicable, describe which groupings were chosen and why                                                         | 6-7                |
| Statistical methods          | 12     | (a) Describe all statistical methods, including those used to control for confounding                                                                                                | 7-8                |
|                              |        | (b) Describe any methods used to examine subgroups and interactions                                                                                                                  | 7-8                |
|                              |        | (c) Explain how missing data were addressed                                                                                                                                          | 7-8                |
|                              |        | (d) If applicable, describe analytical methods taking account of sampling strategy                                                                                                   | 7-8                |
|                              |        | (e) Describe any sensitivity analyses                                                                                                                                                | 7-8                |

|                          |     |                                                                                                                                                                                                              |                       |
|--------------------------|-----|--------------------------------------------------------------------------------------------------------------------------------------------------------------------------------------------------------------|-----------------------|
| <b>Results</b>           |     |                                                                                                                                                                                                              |                       |
| Participants             | 13* | (a) Report numbers of individuals at each stage of study—eg numbers potentially eligible, examined for eligibility, confirmed eligible, included in the study, completing follow-up, and analysed            | 9                     |
|                          |     | (b) Give reasons for non-participation at each stage                                                                                                                                                         | 9                     |
|                          |     | (c) Consider use of a flow diagram                                                                                                                                                                           |                       |
| Descriptive data         | 14* | (a) Give characteristics of study participants (eg demographic, clinical, social) and information on exposures and potential confounders                                                                     | 9, table 1            |
|                          |     | (b) Indicate number of participants with missing data for each variable of interest                                                                                                                          |                       |
| Outcome data             | 15* | Report numbers of outcome events or summary measures                                                                                                                                                         | 9-10, table 2, Fig. 1 |
| Main results             | 16  | (a) Give unadjusted estimates and, if applicable, confounder-adjusted estimates and their precision (eg, 95% confidence interval). Make clear which confounders were adjusted for and why they were included | 9-10, table 2, Fig. 1 |
|                          |     | (b) Report category boundaries when continuous variables were categorized                                                                                                                                    |                       |
|                          |     | (c) If relevant, consider translating estimates of relative risk into absolute risk for a meaningful time period                                                                                             |                       |
| Other analyses           | 17  | Report other analyses done—eg analyses of subgroups and interactions, and sensitivity analyses                                                                                                               |                       |
| <b>Discussion</b>        |     |                                                                                                                                                                                                              |                       |
| Key results              | 18  | Summarise key results with reference to study objectives                                                                                                                                                     | 10                    |
| Limitations              | 19  | Discuss limitations of the study, taking into account sources of potential bias or imprecision. Discuss both direction and magnitude of any potential bias                                                   | 12                    |
| Interpretation           | 20  | Give a cautious overall interpretation of results considering objectives, limitations, multiplicity of analyses, results from similar studies, and other relevant evidence                                   | 10-12                 |
| Generalisability         | 21  | Discuss the generalisability (external validity) of the study results                                                                                                                                        | 10-12                 |
| <b>Other information</b> |     |                                                                                                                                                                                                              |                       |
| Funding                  | 22  | Give the source of funding and the role of the funders for the present study and, if applicable, for the original study on which the present article is based                                                | N/A                   |

\*Give information separately for cases and controls in case-control studies and, if applicable, for exposed and unexposed groups in cohort and cross-sectional studies.

**Note:** An Explanation and Elaboration article discusses each checklist item and gives methodological background and published examples of transparent reporting. The STROBE checklist is best used in conjunction with this article (freely available on the Web sites of PLoS Medicine at <http://www.plosmedicine.org/>, Annals of Internal Medicine at <http://www.annals.org/>, and Epidemiology at <http://www.epidem.com/>). Information on the STROBE Initiative is available at [www.strobe-statement.org](http://www.strobe-statement.org).

# BMJ Open

## Is the Association between Health -Related Quality of Life and Fatigue Mediated by Depression in Patients with Multiple Sclerosis? A Spanish Cross Sectional Study

|                                 |                                                                                                                                                                                                                                                                                                                                                                                                                                                                                                                                                                              |
|---------------------------------|------------------------------------------------------------------------------------------------------------------------------------------------------------------------------------------------------------------------------------------------------------------------------------------------------------------------------------------------------------------------------------------------------------------------------------------------------------------------------------------------------------------------------------------------------------------------------|
| Journal:                        | <i>BMJ Open</i>                                                                                                                                                                                                                                                                                                                                                                                                                                                                                                                                                              |
| Manuscript ID                   | bmjopen-2017-016297.R2                                                                                                                                                                                                                                                                                                                                                                                                                                                                                                                                                       |
| Article Type:                   | Research                                                                                                                                                                                                                                                                                                                                                                                                                                                                                                                                                                     |
| Date Submitted by the Author:   | 17-Oct-2017                                                                                                                                                                                                                                                                                                                                                                                                                                                                                                                                                                  |
| Complete List of Authors:       | Fernández-Muñoz, Juan J; Universidad Rey Juan Carlos, Psychology<br>Cigarán-Méndez, Margarita; Universidad Rey Juan Carlos, Psychology<br>Navarro-Pardo, Esperanza; Universitat de Valencia, Psicología Evolutiva y de la Educación<br>Perez-de-Heredia, Marta; Universidad Rey Juan Carlos, Physiotherapy, Occupational Therapy, Rehabilitation and Physical Medicine.<br>Paras-Bravo, Paula; Universidad de Cantabria, Nursing<br>Fernández-de-las-Peñas, César; Universidad Rey Juan Carlos, Physical Therapy, Occupational Therapy, Rehabilitacion and Physical Medicine |
| <b>Primary Subject Heading</b>: | Neurology                                                                                                                                                                                                                                                                                                                                                                                                                                                                                                                                                                    |
| Secondary Subject Heading:      | Neurology                                                                                                                                                                                                                                                                                                                                                                                                                                                                                                                                                                    |
| Keywords:                       | Multiple sclerosis < NEUROLOGY, Depression & mood disorders < PSYCHIATRY, fatigue                                                                                                                                                                                                                                                                                                                                                                                                                                                                                            |
|                                 |                                                                                                                                                                                                                                                                                                                                                                                                                                                                                                                                                                              |

SCHOLARONE™  
Manuscripts

1  
2  
3  
4  
5  
6  
7  
8  
9  
10  
11  
12  
13  
14  
15  
16  
17  
18  
19  
20  
21  
22  
23  
24  
25  
26  
27  
28  
29  
30  
31  
32  
33  
34  
35  
36  
37  
38  
39  
40  
41  
42  
43  
44  
45  
46  
47  
48  
49  
50  
51  
52  
53  
54  
55  
56  
57  
58  
59  
60

## Is the Association between Health -Related Quality of Life and Fatigue Mediated by Depression in Patients with Multiple Sclerosis? A Spanish Cross Sectional Study

### Authors

Juan J. Fernández-Muñoz<sup>1</sup> PhD; Margarita Cigarán-Méndez<sup>1</sup> PhD; Esperanza Navarro-Pardo<sup>2</sup> PhD; Marta Pérez-de-Heredia-Torres<sup>3</sup> PhD; Paula Parás-Bravo<sup>4</sup> PT; César Fernández-de-las-Peñas<sup>3</sup> PT, PhD, DMSc

### Affiliations

- (1) Department of Psychology, Universidad Rey Juan Carlos, Alcorcón, Spain  
(2) Departamento Psicología Evolutiva y de la Educación, Universitat Valencia, Spain  
(3) Department of Physical Therapy, Occupational Therapy, Rehabilitation and Physical Medicine, Universidad Rey Juan Carlos, Alcorcón, Spain  
(4) Department of Nursing, Universidad de Cantabria, Spain

### Address for reprint requests / corresponding author.

César Fernández de las Peñas  
Facultad de Ciencias de la Salud  
Universidad Rey Juan Carlos  
Avenida de Atenas s/n  
28922 Alcorcón, Madrid  
SPAIN  
E-mail address: [cesarfdlp@yahoo.es](mailto:cesarfdlp@yahoo.es)

Telephone number: + 34 91 488 88 84  
Fax number: + 34 91 488 89 57

**Total word account:** 2,677 words

**Running title:** Depression, quality of life and fatigue in multiple sclerosis

**Disclosure of Conflict of Interest:** The authors declare no conflicts of interest with the content of this article. No funds were received for the study.

**Keywords:** multiple sclerosis, depression, fatigue, quality of life.

### Abstract

1  
2  
3  
4 **Objectives:** To determine the mediating effects of depression on health-related quality  
5  
6 of life and fatigue in individuals with multiple sclerosis (MS). **Design:** A cross-sectional  
7  
8 study. **Setting:** Tertiary urban hospital. **Participants:** One hundred and eight patients  
9  
10 (54% women) with MS participated in this study. **Outcome measures:** Demographic  
11  
12 and clinical data (weight, height, medication, and neurological impairment), fatigue  
13  
14 (Fatigue Impact Scale-FIS), depression (Beck Depression Inventory-BDI/II) and health-  
15  
16 related quality of life (Short-Form Health Survey 36 - SF36) were collected. **Results:**  
17  
18 Fatigue was significantly associated with bodily pain, physical function, mental health  
19  
20 and depression. Depression was associated with bodily pain and mental health. The path  
21  
22 analysis found direct effect from physical function, bodily pain and depression to  
23  
24 fatigue (all,  $P < 0.01$ ). The path model analysis revealed that depression exerted a  
25  
26 mediator effect from bodily pain to fatigue ( $B = -0.04$ ,  $P < 0.01$ ) and from mental health to  
27  
28 fatigue ( $B = -0.16$ ,  $P < 0.01$ ). The amount of fatigue explained by all predictors in the path  
29  
30 model was 37%. **Conclusions:** This study found that depression mediates the  
31  
32 relationship between some health-related quality of life domains and fatigue in people  
33  
34 with MS. Future longitudinal studies focusing on proper management of depressive  
35  
36 symptoms in individuals with MS will help to determine the clinical implications of  
37  
38 these findings.  
39  
40  
41  
42  
43  
44

45 **Keywords:** multiple sclerosis, depression, fatigue, quality of life.  
46  
47  
48  
49  
50  
51  
52  
53  
54  
55  
56  
57  
58  
59  
60



## Strengths and limitations of this study

- The main strength of this study was the inclusion of a homogeneous sample of individuals with multiple sclerosis and the use of specific statistical analyses.
- Since this was a cross-sectional study, cause and effect relationships between the associated variables cannot be inferred. In addition, the sample was composed of patients recruited from urban hospitals, not from the general population.
- The level of depression in our sample of individuals with multiple sclerosis was lower than expected. We do not know if the presence of higher symptoms of depression can lead to further associations or effects.
- We used a general, but not disease-specific questionnaire for assessing health-related quality of life. It is possible that the use of a disease-specific quality of life questionnaire would lead to other potential associations.

## Conflict of Interest

The authors declare no conflicts of interest with the content of this article.

## Funding

No funds were received for the study.

## Patient consent

Obtained

## Ethics approval

This study was approved by the local ethical research committee of the Hospital Universitario Fundación Alcorcón, Madrid, Spain

# Is the Association between Health -Related Quality of Life and Fatigue Mediated by Depression in Patients with Multiple Sclerosis? A Spanish Cross Sectional Study

## Introduction

Multiple sclerosis (MS) is a chronic demyelizing disease of the central nervous system and includes a variety of symptoms, which interferes with daily activities, social, and working life, disturbs emotional well-being and reduce quality of life. It has been reported a worldwide annual incidence of 5.2 per 100,000 persons and an prevalence of 112 cases per 100,000 habitants.<sup>1</sup> In Spain, the prevalence of MS has been found to be 125 cases per 100,000 habitants;<sup>2</sup> however, recent studies have observed an increased prevalence in the previous decade.<sup>3,4</sup>

Among all symptoms experienced by people with MS, fatigue is considered one of the most disabling.<sup>5</sup> The prevalence of fatigue in MS ranges from between 53% to 80%.<sup>6</sup> Fatigue is a risk indicator for conversion from moderate-severe disability to relapsing-remitting MS.<sup>7</sup> In fact, fatigue is influenced by several aspects such as psychological status, social relationship, personal beliefs, as well as personal interaction with the environment.<sup>8</sup> Among all potential relationships, depression and health-related quality of life exhibit the greatest impact on fatigue in people with MS.<sup>9,10</sup>

Depression is the most prevalent comorbid condition reported by subjects with MS.<sup>11,12</sup> It has been recently reported that the presence of depression is an important determinant of cognitive performance<sup>13</sup> and quality of life<sup>14</sup> in individuals with MS. In fact, the relationship between related-fatigue and depression is bidirectional: fatigue can promote depression, but depression may also contribute to worsening self-perceived fatigue. However, the results from current literature are sometimes conflicting. Bakshi

1 et al observed that fatigue was associated with depression, but independently of  
2 disability.<sup>15</sup> Similarly, a recent study found that both fatigue and sleep disturbances  
3 contribute to the development of depression.<sup>16</sup> Other authors have investigated the role  
4 of depression on fatigue. Kroencke et al found that depressed mood was a significant  
5 predictor of fatigue accounting for approximately 23% of its variance.<sup>17</sup> Nevertheless;  
6 others have reported that depression is not directly related to fatigue.<sup>18</sup>

16 Since depression and fatigue can be related by multiple interactions, additional  
17 studies including other variables such as health-related quality of life are needed. In  
18 fact, fatigue and depression can also influence self-perceived quality of life. Tanriverdi  
19 et al observed that fatigue and depression strongly influence the quality of life in MS.<sup>19</sup>  
20 Recent studies have reported that depression and fatigue, as well as related-disability  
21 and physical co-morbidities, are associated with health-related quality of life in people  
22 with MS.<sup>9,10,20</sup> Future studies investigating the association between depression, health-  
23 related quality of life and fatigue in MS are necessary. In fact, a better understanding of  
24 the possible interaction between these multidimensional aspects associated with fatigue  
25 can potentially assist clinicians in determining better therapeutic programs for  
26 individuals with MS. Therefore, the aim of the current study was to further determine  
27 the mediating effects of depression on the association between health-related quality of  
28 life and fatigue in individuals with MS. Since depression is the psychological disorder  
29 not intrinsically provoked by the disease, most commonly experienced by individuals  
30 with MS;<sup>11,12</sup> we hypothesized that the relationships between health-related quality of  
31 life and the MS associated-fatigue would be mediated by depressive symptoms.

## 32 **Methods**

1 Patients diagnosed with definite MS according to the modified McDonald criteria<sup>21</sup>  
2  
3  
4 by an experienced neurologist recruited from a local regional hospital in Madrid (Spain)  
5  
6 between September 2013 and December 2014, were screened for eligibility criteria. The  
7  
8 exclusion criteria included comorbid neurological diseases including herniated disk and  
9  
10 other disorders of the spine, renal disease, cancer, diabetes mellitus, other psychiatric  
11  
12 diseases and a Mini Mental State Examination score < 25.<sup>22</sup> Written informed consent  
13  
14 was obtained from all participants prior to their inclusion in the study. The study design  
15  
16 was approved by the Ethics Committee of Hospital Universitario Fundación Alcorcón  
17  
18 (HUFA 11/087) in Madrid (Spain). All procedures were conducted according to the  
19  
20 Declaration of Helsinki  
21  
22

23  
24 Patients were recruited during their routine neurological visits and were screened  
25  
26 and explored during a stationary phase of the disease. Patients completed a demographic  
27  
28 and clinical questionnaire including age, sex, weight, height, medication, and history of  
29  
30 pain. Subjects underwent a neurological examination and their neurological impairment  
31  
32 was rated with the Expanded Disability Status Scale (EDSS).<sup>23</sup>  
33  
34

### 35 **Multiple Sclerosis Related Fatigue**

36  
37 MS-related fatigue was assessed with the Fatigue Impact Scale (FIS).<sup>24</sup> The FIS  
38  
39 consists of a 40-items questionnaire including 3 subscales assessing the impact of self-  
40  
41 perceived fatigue on cognitive functioning (10 items), physical functioning (10 items),  
42  
43 and psychosocial functioning (20 items). Patients rate on a 5 point Likert scale if fatigue  
44  
45 caused problems during the previous month (0: no problem; 4: extreme problem). The  
46  
47 total score ranges from 0 to 84 points, where higher scores represent more fatigue. This  
48  
49 questionnaire has exhibited good test-retest reliability and validity in people with MS.<sup>25</sup>  
50  
51 In this study, the validated Spanish version of the FIS was used as the main outcome.<sup>26</sup>  
52  
53  
54  
55  
56  
57  
58  
59  
60

## Depression

Depression was assessed with the Beck Depression Inventory (BDI-II). It consists of 21-items assessing affective, cognitive, and somatic symptoms of depression.<sup>27</sup> Patients choose from a group of sentences which best describe how they had been feeling in the preceding two weeks. The score ranges from 0 to 63 points where higher score suggests higher level of depressive symptoms.<sup>28</sup> This questionnaire has exhibited good internal consistency and good convergent and divergent validity in individuals with MS.<sup>29</sup>

## Health-Related Quality of life

The Short-Form Health Survey 36 (SF-36) was used to assess health-related quality of life. This questionnaire assesses 8 domains including physical function, physical role, bodily pain, general health, vitality, social function, role-emotional, and mental health.<sup>30</sup> Each domain is standardized on scores ranging from 0 to 100 points where higher scores represent better quality of life. The SF-36 has shown the ability to discriminate between subjects with health problems and asymptomatic individuals.<sup>31,32</sup> In the current study, the validated Spanish version of the SF-36 questionnaire was used.<sup>33</sup>

## Statistical analysis

Means, standard deviations, and confidence intervals were calculated to describe the sample. The Kolmogorov-Smirnov test revealed that all quantitative data exhibited a normal distribution. To determine the relationship between fatigue and the remaining variables, i.e., depression and health-related quality of life domains, different Pearson product-moment correlation coefficients were firstly assessed.

Secondly, a path model with maximum likelihood estimation was conducted to evaluate the effects of depression between the variables significantly associated with

1 fatigue using AMOS computer program.<sup>34</sup> A path model is defined as a diagram relating  
2 independent (exposure), intermediary (mediating) and dependent (outcome) variables.<sup>35</sup>  
3  
4 In our hypothesized model, fatigue was the dependent variable, health-related quality of  
5 life domains were the independent variables and depression the intermediate, mediating,  
6 of fatigue. In a path analysis, single arrows indicate causation between intermediary and  
7 dependent variable. Further, arrows also connect the error terms with their respective  
8 intermediary variables. Double arrows indicate correlation between pairs of independent  
9 variables. The path coefficient is a standardized regression coefficient (beta) showing  
10 the direct effect of an independent variable (health-related quality of life domain) on the  
11 dependent (fatigue) variable. Indirect effects occur when the relationship between two  
12 variables (e.g. fatigue and mental health) is mediated by one or more variables (i.e.,  
13 depression).

14  
15  
16  
17  
18  
19  
20  
21  
22  
23  
24  
25  
26  
27  
28  
29  
30  
31  
32  
33  
34  
35  
36  
37  
38  
39  
40  
41  
42  
43  
44  
45  
46  
47  
48  
49  
50  
51  
52  
53  
54  
55  
56  
57  
58  
59  
60  
Previous conditions from data were assessed: linearity, additivity, interval level  
data, recursivity, low multicollinearity and adequate sample size.<sup>36</sup> Confirmation of the  
adequacy of the model was conducted within absolute fit indices.<sup>37,38</sup> AMOS provides  
several fit indices that are largely independent of the sample size: the goodness of fit  
index (GFI) and adjusted goodness of fit index (AGFI) whose value reference is at 90  
to consider an acceptable model;<sup>39</sup> and the Comparative Fit Index (CFI), Normed Fit  
Index (NFI) and Tucker-Lewis Index (TLI) which are also adequate if their values are  
over 0.90.<sup>40</sup> Finally, within parsimony adjustment indices, the error of the Root Mean  
Square Approximation (RMSEA) whose values < 0.08 or less are good.<sup>41</sup> Missing data  
were removed to the first recollected sample of participants, and just the sample was  
composed by the final subjects satisfying all inclusion criteria (n=108).

## Results

One hundred and twenty (n=120) consecutive subjects with MS were screened for eligibility criteria. Finally, one hundred and eight (n=108, 90%), 54% women, mean age: 44±8 years; height: 170±9 cm; weight: 71±15 kg satisfied all the eligibility criteria, agreed to participate, and signed the informed consent. The reasons for exclusion were as follows: previous surgery (n=6), pregnancy (n=2), and older than 65 years old (n=4). Demographic and clinical data of the total sample are listed in **Table 1**.

### Correlation Analysis

**Table 2** shows the Pearson's correlation coefficients between variables included in the path model showing significant association with fatigue. Fatigue was significantly negative associated (higher score) with bodily pain ( $r=-0.48$ ,  $P<0.01$ ), physical function ( $r=-0.31$ ,  $P<0.01$ ) and mental health ( $r=-0.42$ ,  $P<0.01$ ), and also significantly positive associated with depression ( $r=0.47$ ,  $P<0.01$ ): the higher the self-perceived fatigue, the worse physical function, the worse mental health, the higher bodily pain, or the higher depressive symptom. Depression was also negatively associated with bodily pain ( $r=-0.40$ ,  $P<0.01$ ) and mental health ( $r=-0.61$ ,  $P<0.01$ ): the worse mental health or higher presence of bodily pain, the higher the level of depression.

### Path analysis

The hypothesized model fit of the data was excellent with Goodness of Fit Index (GFI): 0.98; Adjusted Goodness of Fit Index (AGFI): 0.91; Comparative Fit Index (CFI): 0.98; Tucker-Lewis Index: 0.94; Normed Fit Index: 0.97. Further, Root Mean Square Error of Approximation (RMSEA) was 0.08. **Figure 1** displays the parameter estimates (standardized solution).

According to the direct effects, a significant path was noted from mental health ( $B=-.53$ ,  $P<0.01$ ) to depression with a Standard Error (SE) of.035. Likewise, significant

1 paths were also indicated between physical function ( $B=-.23$ ,  $P<0.01$ ,  $SE=.054$ ) bodily  
2 pain ( $B=-.36$ ,  $P<0.01$ ,  $SE=.070$ ) and depression ( $B= .29$ ,  $P<0.01$ ,  $SE=.025$ ) on fatigue.  
3  
4 The direct effect from bodily pain on depression did not reach the significance ( $B=-.15$ ,  
5  
6  $P=0.07$ ,  $SE=.024$ ). Furthermore, significant indirect effects in the path analysis model  
7  
8 from bodily pain to fatigue mediated by depression ( $B=-.04$ ,  $P<0.01$ ,  $SE=.031$ ) and from  
9  
10 mental health to fatigue, also mediated by depression ( $B=-.16$   $P<0.01$ ,  $SE=.015$ ) were  
11  
12 observed. Overall, the amount of fatigue explained by all predictors in the model was  $R^2$   
13  
14 0.37.  
15  
16  
17  
18  
19  
20

## 21 Discussion

22  
23 The present study demonstrated that depression mediates the relationship between  
24  
25 some health-related quality of life domains, such as mental health and bodily pain, and  
26  
27 fatigue in individuals with MS. These results support the assumption that depression is  
28  
29 related to fatigue and that can mediate the effects of health-related quality of life in MS.  
30  
31

32 Our findings have shown, firstly, and in accordance with prior literature<sup>9,10 14-17</sup> that  
33  
34 depression is a psychological factor directly associated with fatigue in people with MS.  
35  
36 However, previous studies have not investigated the mediating effects of depression on  
37  
38 the association with other variables. The current study showed that depression mediated  
39  
40 the association between some health-related quality of life domains, such as bodily pain  
41  
42 and mental health, with fatigue, suggesting that depressive levels mediate the  
43  
44 contribution of quality of life to related-fatigue. The relevance of depression was further  
45  
46 supported by the fact that depression also showed an effect on self-perceived fatigue in  
47  
48 our sample of subjects with MS. This means that depression has an influence on fatigue,  
49  
50 but also other mediating influences in other outcomes. This finding is quite interesting if  
51  
52 we consider that depression symptoms of our sample of people with MS was small  
53  
54  
55  
56



1 since scores reflected minimal or mild signs of depression.<sup>27</sup> It would be plausible that  
2  
3  
4 higher levels of depression may reveal stronger relationships.  
5

6 The association between mental health and fatigue in MS is not new since some  
7  
8 studies have reported that fatigue contributes to mental fatigue, worse emotional well-  
9  
10 being, and worse cognitive performance.<sup>42,43</sup> The novelty of the current study was that  
11  
12 the effect of mental health on fatigue was mediated by depression. This is an expected  
13  
14 finding, since depression contributes to worse cognitive performance.<sup>13</sup> It would be  
15  
16 reasonable to consider that individuals with MS suffering fatigue experience worse  
17  
18 cognitive function, which may in turn provoke depressive symptoms, and therefore,  
19  
20 increase the self-perceived fatigue. Bidirectional reinforcement between mental health  
21  
22 and depression can create a vicious cycle by promoting self-perceived fatigue in people  
23  
24 with MS.  
25  
26  
27

28 Another health-related quality of life domain which was directly associated with  
29  
30 fatigue was bodily pain. This was expected since the presence of pain also contributes to  
31  
32 fatigue.<sup>44</sup> Nevertheless, similar to mental health, the effect of bodily pain on fatigue was  
33  
34 mediated by depression. It can be hypothesized that pain induces depression and that  
35  
36 pain will promote a worse fatigue self-perception. This hypothesis is also supported by  
37  
38 another study which used a similar analysis that in our study, where higher pain levels  
39  
40 were associated with fatigue, which in turn were associated with higher depression.<sup>45</sup>  
41  
42  
43 Current and previous findings suggest that proper management of depressive symptoms  
44  
45 would be a key element in the treatment of pain in individuals with MS; although  
46  
47 further studies are needed.  
48  
49  
50

51 The path model also identified that physical function was associated with self-  
52  
53 perceived fatigue in our sample of individuals with MS. In this case, the association of  
54  
55

1 physical function and fatigue was not mediated by depression, supporting a direct effect  
2 between these variables. These findings are similar to the results by Turpin et al who  
3 found that patients with MS with greater fatigue and disability exhibited poorer physical  
4 activity.<sup>46</sup> Again, it is expected that individuals reporting greater fatigue have lower  
5 physical activity. It is possible that this association could influence other psychological  
6 outcomes included in our path analysis, since fatigue may contribute to depression by  
7 reducing physical function as the result of lack of energy.<sup>47</sup> These associations support a  
8 complex interaction between physical outcomes, depressive symptoms, and fatigue.  
9

10  
11  
12  
13  
14  
15  
16  
17  
18  
19  
20  
21  
22  
23  
24  
25  
26  
27  
28  
29  
30  
31  
32  
33  
34  
35  
36  
37  
38  
39  
40  
41  
42  
43  
44  
45  
46  
47  
48  
49  
50  
51  
52  
53  
54  
55  
56  
57  
58  
59  
60

Uncertainty over biological mechanisms accounting for these interactions, the current results have important clinical implications. Our results indicate that depression, that is, an emotional status not directly caused by the condition, plays a relevant role in the relationship between fatigue and health-related quality of life in people with MS. Therefore, our results suggest that proper management of depression can be effective for improving self-perceived fatigue in people with MS by impacting mental health and bodily pain. It is possible that management of fatigue by treating depressive symptoms would lead to an increase of physical activity in these individuals. This hypothesis is supported by a recent review reporting that proper psychological management produced improvements in both psychological and physiological outcomes in patients with MS.<sup>48</sup> However; future randomized clinical trials are needed to confirm this hypothesis.

There are a number of limitations that should be recognized. First, we used a cross-sectional design; therefore, cause and effect relationships between the variables cannot be inferred. Second, the sample was composed of patients with MS recruited from different urban hospitals. Therefore, extrapolation of the current results to more diverse populations should be conducted with caution. Additionally, we used a non-

1 probabilistic sampling for a finite population for calculating our sample size. This was  
2  
3  
4 conducted applying a 95% confidence level and a sampling error for the final set of  
5  
6 participants under 5%. Although we could not estimate a priori sample size, we believe  
7  
8 that our sample is representative of the population. Third, the level of depressive  
9  
10 symptoms in our sample of patients with MS was lower than expected. In fact, scores  
11  
12 showed that almost all participants exhibited small depressive levels. It is possible that  
13  
14 the presence of higher symptoms of depression can lead to further associations or  
15  
16 effects. Fourth, we should consider that health-related quality of life was assessed with a  
17  
18 general, but not disease-specific, questionnaire. It is possible that the use of a MS-  
19  
20 specific quality of life questionnaire, i.e., MSQoL-54, would lead to other potential  
21  
22 associations. Finally, other potential cofounder variables, such as sleep disturbances or  
23  
24 anxiety, which could give a broader vision of the biopsychosocial model approach were  
25  
26 not included. This study would benefit from longitudinal data to further determine the  
27  
28 impact of proper management of depressive symptoms on the identified associations  
29  
30 over time in patients with MS.  
31  
32  
33  
34  
35  
36  
37  
38  
39  
40  
41  
42  
43  
44  
45  
46

## 47 **Conclusions**

48  
49 This study found that depression mediated the relationship between mental health  
50  
51 and bodily pain, but not the association of physical activity, and fatigue in people with  
52  
53 MS. These results support the assumption that depression is directly related with fatigue  
54  
55

1 and that can mediate the effects of health-related quality of life in individuals with MS.  
2  
3  
4 Future longitudinal studies will help to determine the clinical implications of these  
5  
6 findings.  
7  
8  
9

### 10 **Author contributions**

11  
12 All authors contributed to the study concept and design. Juan J. Fernández-Muñoz and  
13  
14 César Fernández-de-las-Peñas did the main statistical analysis and interpretation of data.  
15  
16 César Fernández-de-las-Peñas, Margarita Cigarán-Méndez and Paula Parás-Bravo  
17  
18 contributed to draft the report. Margarita Cigarán-Méndez, Esperanza Navarro-Pardo  
19  
20 and Paula Parás-Bravo provided administrative, technical, and material support.  
21  
22 Esperanza Navarro-Pardo and Marta Pérez-de-Heredia-Torres supervised the study. All  
23  
24 authors revised the text for intellectual content and have read and approved the final  
25  
26 version of the manuscript.  
27  
28  
29  
30  
31  
32  
33  
34  
35  
36  
37  
38  
39  
40  
41  
42  
43  
44  
45

### 46 **References**

- 47  
48 1. Melcon M, Correale J, Melcon C. Is it time for a new global classification of  
49  
50 multiple sclerosis? *J Neurol Sci* 2014; 344: 171-181  
51  
52  
53  
54  
55

- 1  
2  
3  
4  
5  
6  
7  
8  
9  
10  
11  
12  
13  
14  
15  
16  
17  
18  
19  
20  
21  
22  
23  
24  
25  
26  
27  
28  
29  
30  
31  
32  
33  
34  
35  
36  
37  
38  
39  
40  
41  
42  
43  
44  
45  
46  
47  
48  
49  
50  
51  
52  
53  
54  
55  
56  
57  
58  
59  
60
2. Fernández O, Fernández V, Guerrero M et al E. Multiple sclerosis prevalence in Malaga, southern Spain estimated by the capture-recapture method. *Mult Scler* 2012; 18: 372-6.
3. Otero-Romero S, Roura P, Solà J et al. Increase in the prevalence of multiple sclerosis over a 17-year period in Osona, Catalonia, Spain. *Mult Scler* 2013; 19: 245-8.
4. Candelieri-Merlicco A, Valero-Delgado F, Martínez-Vidal S et al. Prevalence of multiple sclerosis in Health District III, Murcia, Spain. *Mult Scler Relat Disord* 2016; 9: 31-5.
5. Shah A. Fatigue in multiple sclerosis. *Phys Med Rehabil Clin N Am* 2009; 20: 363-7
6. Braley TJ, Chervin RD. Fatigue in multiple sclerosis: mechanisms, evaluation, and treatment. *Sleep* 2010; 33: 1061-7
7. Cavallari M, Palotai M, Glanz BI et al. Fatigue predicts disease worsening in relapsing-remitting multiple sclerosis patients. *Mult Scler* 2016; 22: 1841-1849.
8. Hadjimichael O, Vollmer T, Oleen-Burkey M; North American Research Committee on Multiple Sclerosis. Fatigue characteristics in multiple sclerosis: the North American Research Committee on Multiple Sclerosis (NARCOMS) survey. *Health Qual Life Outcomes* 2008; 6: 100
9. Nourbakhsh B, Julian L, Waubant E. Fatigue and depression predict quality of life in patients with early multiple sclerosis: a longitudinal study. *Eur J Neurol* 2016; 23: 1482-6.
10. Kargarfard M, Eetemadifar M, Mehrabi M, Maghzi AH, Hayatbakhsh MR. Fatigue, depression, and health-related quality of life in patients with multiple sclerosis in Isfahan, Iran. *Eur J Neurol* 2012; 19: 431-7.

- 1  
2  
3  
4  
5  
6  
7  
8  
9  
10  
11  
12  
13  
14  
15  
16  
17  
18  
19  
20  
21  
22  
23  
24  
25  
26  
27  
28  
29  
30  
31  
32  
33  
34  
35  
36  
37  
38  
39  
40  
41  
42  
43  
44  
45  
46  
47  
48  
49  
50  
51  
52  
53  
54  
55  
56  
57  
58  
59  
60
11. Marrie RA, Patten SB, Tremlett H, Wolfson C, Warren S, Svenson LW, Jette N, Fisk J; CIHR Team in the Epidemiology and Impact of Comorbidity on Multiple Sclerosis. Sex differences in comorbidity at diagnosis of multiple sclerosis: A population-based study. *Neurology* 2016 Mar 9. pii: 10.1212/WNL.0000000000002481.
12. Marrie RA, Reingold S, Cohen J, Stuve O, Trojano M, Sorensen PS, Cutter G, Reider N. The incidence and prevalence of psychiatric disorders in multiple sclerosis: a systematic review. *Mult Scler* 2015; 21: 305-17
13. Nunnari D, De Cola MC, D'Aleo G, Rifici C, Russo M, Sessa E, Bramanti P, Marino S. Impact of depression, fatigue, and global measure of cortical volume on cognitive impairment in multiple sclerosis. *Biomed Res Int* 2015; 2015: 519785.
14. Fricska-Nagy Z, Füvesi J, Rózsa C, Komoly S, Jakab G, Csépany T et al. The effects of fatigue, depression and the level of disability on the health-related quality of life of glatiramer acetate-treated relapsing-remitting patients with multiple sclerosis in Hungary. *Mult Scler Relat Disord.* 2016; 7: 26-32.
15. Bakshi R, Shaikh ZA, Miletich RS, Czarnecki D, Dmochowski J, Henschel K, et al. Fatigue in multiple sclerosis and its relationship to depression and neurologic disability. *Mult Scler* 2000; 6:181-185
16. Edwards KA, Molton IR, Smith AE, Ehde DM, Bombardier CH, Battalio S, Jensen MP. The relative importance of baseline pain, fatigue, sleep and physical activity: Predicting change in depression in adults with multiple sclerosis. *Arch Phys Med Rehabil* 2016; 97: 1309-15.
17. Kroencke DC, Lynch SG, Denney DR. Fatigue in multiple sclerosis: relationship to depression, disability, and disease pattern. *Mult Scler* 2000; 6: 131-136.

- 1  
2  
3  
4  
5  
6  
7  
8  
9  
10  
11  
12  
13  
14  
15  
16  
17  
18  
19  
20  
21  
22  
23  
24  
25  
26  
27  
28  
29  
30  
31  
32  
33  
34  
35  
36  
37  
38  
39  
40  
41  
42  
43  
44  
45  
46  
47  
48  
49  
50  
51  
52  
53  
54  
55  
56  
57  
58  
59  
60
18. Šabanagić-Hajrić S, Suljić E, Kučukalić A. Fatigue during multiple sclerosis relapse and its relationship to depression and neurological disability. *Psychiatr Danub* 2015; 27: 406-12
  19. Tanriverdi D, Okanli A, Sezgin S, Ekinci M. Quality of life in patients with multiple sclerosis in Turkey: relationship to depression and fatigue. *J Neurosci Nurs* 2010; 42: 267-73.
  20. Berrigan LI, Fisk JD, Patten SB, Tremlett H, Wolfson C, Warren S, Fiest KM, McKay KA, Marrie RA; CIHR Team in the Epidemiology and Impact of comorbidity on Multiple Sclerosis (ECoMS). Health-related quality of life in multiple sclerosis: Direct and indirect effects of comorbidity. *Neurology* 2016 pii: 10.1212/WNL.0000000000002564.
  21. Polman CH, Reingold SC, Banwell B, et al. Diagnostic criteria for multiple sclerosis: 2010 revisions to the McDonald criteria. *Ann Neurol* 2011; 69: 292-302
  22. Folstein MF, Folstein SE, McHugh PR. 'Mini-mental state': a practical method for grading the cognitive state of patients for the clinician. *J Psychiatr Res* 1975; 12: 189- 98
  23. Kurtzke J. Rating neurologic impairment in multiple sclerosis: an Expanded Disability Status Scale (EDSS). *Neurology* 1983; 33: 1444-1452
  24. Fisk JD, Ritvo PG, Ross L, Haase DA, Marrie TJ, Schlech WF. Measuring the functional impact of fatigue: initial validation of the fatigue impact scale. *Clin Infect Dis* 1994; 18: S79-83.
  25. Mathiowetz V. Test-retest reliability and convergent validity of the Fatigue Impact Scale for persons with multiple sclerosis. *Am J Occup Ther* 2003; 57: 389-395

- 1  
2  
3  
4  
5  
6  
7  
8  
9  
10  
11  
12  
13  
14  
15  
16  
17  
18  
19  
20  
21  
22  
23  
24  
25  
26  
27  
28  
29  
30  
31  
32  
33  
34  
35  
36  
37  
38  
39  
40  
41  
42  
43  
44  
45  
46  
47  
48  
49  
50  
51  
52  
53  
54  
55  
56  
57  
58  
59  
60
26. Benito-León J, Martínez-Martín P, Frades B, et al (2007). Impact of fatigue in multiple sclerosis: The fatigue impact scale for daily use (D-FIS). *Mult Scler* 2007; 13: 645–651.
27. Beck AT, Steer RA, Brown GK. *Beck Depression Inventory*, 2nd ed. San Antonio, Texas; The Psychological Corporation, 1996
28. Beck AT, Steer RA, Garbin MG. Psychometric properties of the Beck Depression Inventory: twenty-five years of evaluation. *Clin Psychol Rev* 1988; 8: 77-100
29. Sacco R, Santangelo G, Stamenova S et al. Psychometric properties and validity of Beck Depression Inventory II in multiple sclerosis. *Eur J Neurol* 2016; 23: 744-50.
30. Ware JE Jr, Sherbourne CD. The MOS 36-item short-form health survey (SF-36). I. Conceptual framework and item selection. *Med Care* 1992; 30: 473-83
31. Ware JE, Snow KK, Kosinski M, Gandek B *SF-36 Health Survey: manual and interpretation guide*, Boston, MA: New England Medical Center, The Health Institute; 1993
32. The Canadian Burden of Illness Study Group. Burden of illness of multiple sclerosis: part II: quality of life. *Can J Neurol Sci* 1998; 25: 31-38
33. Alonso J, Prieto L, Antó JM. [The Spanish version of the SF-36 Health Survey (the SF-36 health questionnaire): an instrument for measuring clinical results]. *Med Clin (Barc)* 1995; 104: 771-6.
34. Abuckle JL, Wothke W. *Amos 4.0 users guide*. Chicago: Small waters; 1999.
35. Duncan O. *Path analysis: Sociological examples*. *Am J Sociology* 1966; 72: 1-12
36. Kline RB. *Principles and practice of structural equation modeling* (2nd ed.). New York: Guilford; 2005



- 1  
2 37. Jöreskog KG, Sörbom D. Advanced in factor analysis and structural equation  
3  
4 models. Cambridge: M.A. Abl; 1979  
5  
6 38. Bentler PM. Comparative fit indices in structural models. Psychological Bull  
7  
8 1990; 107: 238-246  
9  
10 39. Hu L, Bentler PM. Cut-off criteria for fit indexes in covariance structure  
11  
12 analysis: conventional criteria versus new alternatives. Structural Equation Mod  
13  
14 1999; 6: 1-55.  
15  
16 40. Bentler PM. Comparative fit indices in structural models. Psychological Bull  
17  
18 1990; 107: 238-246  
19  
20  
21 41. Steiger JH, Lind C. Statistically based tests for the number of common factors.  
22  
23 Paper presented at the annual meeting of the Psychometric Society, Iowa City,  
24  
25 IA; 1980.  
26  
27 42. Lerdal A, Gulowsen Celiusb E, Kruppc L, Dahl AA. A prospective study of  
28  
29 patterns of fatigue in multiple sclerosis. Eur J Neurol 2007; 14: 1338-1343  
30  
31 43. Ukueberuwa DM, Arnett PA. Evaluating the role of coping style as a moderator  
32  
33 of fatigue and risk for future cognitive impairment in multiple sclerosis. J Int  
34  
35 Neuropsychol Soc 2014 Jul 7:1-5  
36  
37  
38  
39  
40  
41  
42 44. Shahrbanian S, Duquette P, Ahmed S, Mayo NE. Pain acts through fatigue to  
43  
44 affect participation in individuals with multiple sclerosis. Qual Life Res 2016;  
45  
46 25: 477-91  
47  
48  
49  
50  
51  
52  
53  
54  
55  
56  
57  
58  
59  
60

- 1  
2  
3  
4  
5  
6  
7  
8  
9  
10  
11  
12  
13  
14  
15  
16  
17  
18  
19  
20  
21  
22  
23  
24  
25  
26  
27  
28  
29  
30  
31  
32  
33  
34  
35  
36  
37  
38  
39  
40  
41  
42  
43  
44  
45  
46  
47  
48  
49  
50
45. Amtmann D, Askew RL, Kim J, Chung H, Ehde D, Bombardier C et al.  
Pain affects depression through anxiety, fatigue, and sleep in multiple sclerosis.  
Rehabil Psychol. 2015; 60: 81-90
46. Turpin KV, Carroll LJ, Cassidy JD, Hader WJ. Deterioration in the health-  
related quality of life of persons with multiple sclerosis: the possible warning  
signs. Mult Scler 2007; 13: 1038-45
47. Penner IK, Bechtel N, Raselli C, Stöcklin M, Opwis K, Kappos L, Calabrese P.  
Fatigue in multiple sclerosis relation to depression, physical impairment,  
personality and action control. Mult Scler 2007; 13: 1161-1167
48. Pagnini F, Bosma CM, Phillips D, Langer E. Symptom changes in multiple  
sclerosis following psychological interventions: a systematic review. BMC  
Neurol 2014; 14: 222.

51  
52  
53  
54  
55  
56  
57  
58  
59  
60

### Legend of Figure

1 **Figure 1:** Path analyses relating mental health, bodily pain and physical function with  
2 fatigue with the intermediate effect of depression. Standardized direct path coefficients  
3 are presented. In this model mental health predicts depression, while the independent  
4 variable (fatigue) is predicted by depression and also directly by physical activity. The  
5 straight arrows represent regression paths for presumed causal relationships, which the  
6 curved double-headed arrows represent assumed correlations among the variables.  
7  
8  
9  
10  
11  
12  
13  
14  
15  
16  
17  
18  
19  
20  
21  
22  
23  
24  
25  
26  
27  
28  
29  
30  
31  
32  
33  
34  
35  
36  
37  
38  
39  
40  
41  
42  
43  
44  
45  
46  
47  
48  
49  
50  
51  
52  
53  
54  
55  
56  
57  
58  
59  
60

For peer review only

**TABLE 1:** Demographics and specific disease clinical data for the total sample (n = 108)\*

|                                         |                         |
|-----------------------------------------|-------------------------|
| <b>Gender (male / female) n (%)</b>     | 49 (45%) / 59 (55%)     |
| <b>Age (years)</b>                      | 44 ± 8 (42 - 45)        |
| <b>Height (cm)</b>                      | 170 ± 9 (168-172)       |
| <b>Weight (kg)</b>                      | 71.5 ± 15 (68-75)       |
| <b>Disease course n, (%)</b>            |                         |
| Relapsing remitting                     | 80 (74%)                |
| Secondary progressive                   | 19 (18%)                |
| Primary progressive                     | 8 (8%)                  |
| <b>Disease duration (years)</b>         | 12.5 ± 8.0 (11.0-14.2)  |
| <b>EDDS (0-10)</b>                      | 3.4 ± 1.7 (3.1-3.8)     |
| <b>FIS (total score, 0-84)</b>          | 38.7 ± 19.2 (34.9-42.5) |
| <b>Physical Function (SF-36, 0-100)</b> | 55.5 ± 27.8 (49.9-60.9) |
| <b>Physical role (SF-36, 0-100)</b>     | 49.5 ± 40.7 (41.4-57.6) |
| <b>Bodily pain (SF-36, 0-100)</b>       | 66.2 ± 23.5 (62.5-70.8) |
| <b>General health (SF-36, 0-100)</b>    | 44.8 ± 21.1 (40.6-49.1) |
| <b>Vitality (SF-36, 0-100)</b>          | 44.9 ± 19.8 (40.9-48.8) |
| <b>Social function (SF-36, 0-100)</b>   | 71.2 ± 24.2 (66.4-76.0) |
| <b>Emotional role (SF-36, 0-100)</b>    | 78.3 ± 35.9 (71.2-85.4) |
| <b>Mental health (SF-36, 0-100)</b>     | 68.6 ± 16.4 (65.4-71.9) |
| <b>BDI - II (0-63)</b>                  | 10.2 ± 6.7 (8.8-11.5)   |

FIS: Fatigue Impact Scale; EDSS: Expanded Disability Status Scale; BDI - II: Beck Depression Inventory

\*Data are mean ± SD (95% confidence interval).

**TABLE 2:** Pearson-Product Moment Correlation Matrix for the Study Variables Included in the Path Model

|                              | Mean | SD   | 95%CI       | Kurtosis | Skewness | 1       | 2       | 3     | 4       |
|------------------------------|------|------|-------------|----------|----------|---------|---------|-------|---------|
| 1. Fatigue (FIS, 0-84)       | 38.7 | 19.2 | 34.9 - 42.5 | -.48     | .22      |         |         |       |         |
| 2. Bodily pain (0-100)       | 66.2 | 23.5 | 62.5 - 70.8 | -.46     | -.28     | -.488** |         |       |         |
| 3. Physical function (0-100) | 55.5 | 27.8 | 49.9 - 60.9 | -1.20    | .00      | -.308** | .072    |       |         |
| 4. Mental Health (0-100)     | 68.6 | 16.4 | 65.4 - 71.9 | -.70     | -.15     | -.424** | .468**  | .106  |         |
| 5. Depression (0-63)         | 10.2 | 6.7  | 8.8 - 11.5  | .33      | .72      | .475**  | -.403** | -.184 | -.606** |

SD: Standard deviation; 95%CI: 95% confidence interval

<sup>1</sup> Skewness standard error = .23; <sup>2</sup> Kurtosis standard error = .46: \*\* P<.01; \*P<.05 (two tailed)

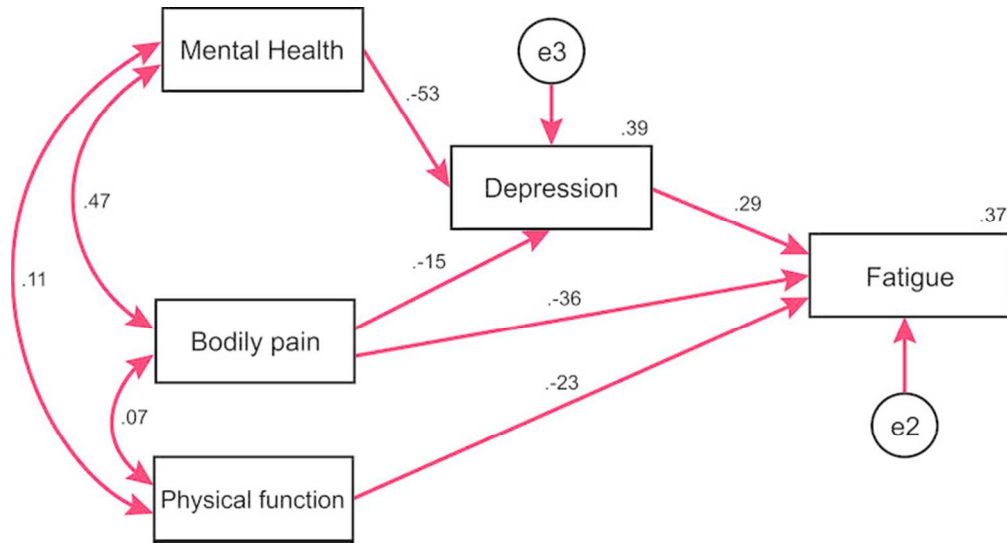

67x36mm (300 x 300 DPI)

review only

**STROBE 2007 (v4) Statement—Checklist of items that should be included in reports of *cross-sectional studies***

| Section/Topic                | Item # | Recommendation                                                                                                                                                                       | Reported on page # |
|------------------------------|--------|--------------------------------------------------------------------------------------------------------------------------------------------------------------------------------------|--------------------|
| Title and abstract           | 1      | (a) Indicate the study's design with a commonly used term in the title or the abstract                                                                                               | 1                  |
|                              |        | (b) Provide in the abstract an informative and balanced summary of what was done and what was found                                                                                  | 2                  |
| <b>Introduction</b>          |        |                                                                                                                                                                                      |                    |
| Background/rationale         | 2      | Explain the scientific background and rationale for the investigation being reported                                                                                                 | 4-5                |
| Objectives                   | 3      | State specific objectives, including any pre-specified hypotheses                                                                                                                    | 5                  |
| <b>Methods</b>               |        |                                                                                                                                                                                      |                    |
| Study design                 | 4      | Present key elements of study design early in the paper                                                                                                                              | 6                  |
| Setting                      | 5      | Describe the setting, locations, and relevant dates, including periods of recruitment, exposure, follow-up, and data collection                                                      | 6                  |
| Participants                 | 6      | (a) Give the eligibility criteria, and the sources and methods of selection of participants                                                                                          | 6                  |
| Variables                    | 7      | Clearly define all outcomes, exposures, predictors, potential confounders, and effect modifiers. Give diagnostic criteria, if applicable                                             | 6-7                |
| Data sources/<br>measurement | 8*     | For each variable of interest, give sources of data and details of methods of assessment (measurement). Describe comparability of assessment methods if there is more than one group | 6-7                |
| Bias                         | 9      | Describe any efforts to address potential sources of bias                                                                                                                            | 6-7                |
| Study size                   | 10     | Explain how the study size was arrived at                                                                                                                                            | 13                 |
| Quantitative variables       | 11     | Explain how quantitative variables were handled in the analyses. If applicable, describe which groupings were chosen and why                                                         | 6-7                |
| Statistical methods          | 12     | (a) Describe all statistical methods, including those used to control for confounding                                                                                                | 7-8                |
|                              |        | (b) Describe any methods used to examine subgroups and interactions                                                                                                                  | 7-8                |
|                              |        | (c) Explain how missing data were addressed                                                                                                                                          | 7-8                |
|                              |        | (d) If applicable, describe analytical methods taking account of sampling strategy                                                                                                   | 7-8                |
|                              |        | (e) Describe any sensitivity analyses                                                                                                                                                | 7-8                |

|                          |     |                                                                                                                                                                                                              |                       |
|--------------------------|-----|--------------------------------------------------------------------------------------------------------------------------------------------------------------------------------------------------------------|-----------------------|
| <b>Results</b>           |     |                                                                                                                                                                                                              |                       |
| Participants             | 13* | (a) Report numbers of individuals at each stage of study—eg numbers potentially eligible, examined for eligibility, confirmed eligible, included in the study, completing follow-up, and analysed            | 9                     |
|                          |     | (b) Give reasons for non-participation at each stage                                                                                                                                                         | 9                     |
|                          |     | (c) Consider use of a flow diagram                                                                                                                                                                           |                       |
| Descriptive data         | 14* | (a) Give characteristics of study participants (eg demographic, clinical, social) and information on exposures and potential confounders                                                                     | 9, table 1            |
|                          |     | (b) Indicate number of participants with missing data for each variable of interest                                                                                                                          |                       |
| Outcome data             | 15* | Report numbers of outcome events or summary measures                                                                                                                                                         | 9-10, table 2, Fig. 1 |
| Main results             | 16  | (a) Give unadjusted estimates and, if applicable, confounder-adjusted estimates and their precision (eg, 95% confidence interval). Make clear which confounders were adjusted for and why they were included | 9-10, table 2, Fig. 1 |
|                          |     | (b) Report category boundaries when continuous variables were categorized                                                                                                                                    |                       |
|                          |     | (c) If relevant, consider translating estimates of relative risk into absolute risk for a meaningful time period                                                                                             |                       |
| Other analyses           | 17  | Report other analyses done—eg analyses of subgroups and interactions, and sensitivity analyses                                                                                                               |                       |
| <b>Discussion</b>        |     |                                                                                                                                                                                                              |                       |
| Key results              | 18  | Summarise key results with reference to study objectives                                                                                                                                                     | 10                    |
| Limitations              | 19  | Discuss limitations of the study, taking into account sources of potential bias or imprecision. Discuss both direction and magnitude of any potential bias                                                   | 12                    |
| Interpretation           | 20  | Give a cautious overall interpretation of results considering objectives, limitations, multiplicity of analyses, results from similar studies, and other relevant evidence                                   | 10-12                 |
| Generalisability         | 21  | Discuss the generalisability (external validity) of the study results                                                                                                                                        | 10-12                 |
| <b>Other information</b> |     |                                                                                                                                                                                                              |                       |
| Funding                  | 22  | Give the source of funding and the role of the funders for the present study and, if applicable, for the original study on which the present article is based                                                | N/A                   |

\*Give information separately for cases and controls in case-control studies and, if applicable, for exposed and unexposed groups in cohort and cross-sectional studies.

**Note:** An Explanation and Elaboration article discusses each checklist item and gives methodological background and published examples of transparent reporting. The STROBE checklist is best used in conjunction with this article (freely available on the Web sites of PLoS Medicine at <http://www.plosmedicine.org/>, Annals of Internal Medicine at <http://www.annals.org/>, and Epidemiology at <http://www.epidem.com/>). Information on the STROBE Initiative is available at [www.strobe-statement.org](http://www.strobe-statement.org).
